# Small size of recorded neuronal structures confines the accuracy in direct axonal voltage measurements

Viktor János Oláh<sup>1,2</sup>, Gergely Tarcsay<sup>1</sup> and János Brunner<sup>1</sup>

<sup>1</sup> Laboratory of Cellular Neuropharmacology, Institute of Experimental Medicine, Budapest, Hungary

<sup>2</sup> János Szentágothai School of Neurosciences, Semmelweis University, Budapest, Hungary

*Corresponding Author:* János Brunner

Email: [brunner.janos@koki.hu](mailto:brunner.janos@koki.hu)

## Abstract

**Patch-clamp instruments including amplifier circuits and pipettes affect the recorded voltage signals. We hypothesized that realistic and complete *in silico* representation of recording instruments together with detailed morphology and biophysics of small recorded structures will precisely reveal signal distortions and provides a tool that predicts native signals from distorted voltage recordings. Therefore, we built a model that was verified by small axonal recordings. The model accurately recreated actual action potential measurements with typical recording artefacts and predicted the native electrical behavior. The simulations verified that recording instruments substantially filter voltage recordings. Moreover, we revealed that instrumentation directly interferes with local signal generation depending on the size of the recorded structures, which complicates the interpretation of recordings from smaller structures, such as axons. However, our model offers a straightforward approach that predicts the native waveforms of fast voltage signals and the underlying conductances even from the smallest neuronal structures.**

23

## 24 **Introduction**

25 Patch-clamp technique is affected by limitations that originate primarily from the physical properties of the  
26 recording pipettes (Benndorf, 1995; Hamill, Marty, Neher, Sakmann, & Sigworth, 1981; Marty & Neher, 1995).  
27 Patch pipettes have significant resistance ( $R_{\text{pip}}$ ) and their glass wall represent a substantial capacitive surface ( $C_{\text{pip}}$ )  
28 as well. Limitations can be reduced by optimizing the recording conditions (that is, with the reduction of the  $R_{\text{pip}}$   
29 and  $C_{\text{pip}}$ ) and corrected by using compensatory mechanisms of the amplifiers. Under standard recording  
30 conditions in measurements from relatively large structures, such as neuronal somata, these optimizations and  
31 corrections can sufficiently reduce distortions to an acceptable level. Therefore, the difference between the  
32 recorded and native voltage signals are negligible during good current clamp conditions in most neuronal  
33 structures. However, the reduction of instrumental distortions could become inherently insufficient in cases where  
34 the recorded structures are small, such as most of the central synapses. Recording pipettes for small neuronal  
35 structures must have small tip, which inevitably results in larger  $R_{\text{pip}}$  values that substantially filters the recorded  
36 signals (Benndorf, 1995; Novak et al., 2013; Ying, Bruckbauer, Rothery, Korchev, & Klenerman, 2002).  
37 Consequently, the fast voltage signals such as the action potentials (APs) are particularly vulnerable to signal  
38 distortion associated with direct recordings in small axonal structures. The shape of axonal APs is a key  
39 determinant of neuronal signaling that affects neurotransmitter release and short-term dynamics in synaptic  
40 connections (Bean, 2007; Borst & Sakmann, 1999; Chao & Yang, 2019; Geiger & Jonas, 2000; Katz & Miledi,  
41 1967; Kawaguchi & Sakaba, 2015; Zbili & Debanne, 2019). Therefore, accurate AP measurements are essential  
42 to understand fundamental mechanisms of the neuronal information flow. Recent developments of the recording  
43 apparatus allows collecting voltage signals from the finest axonal structures (Kawaguchi & Sakaba, 2015; Novak  
44 et al., 2013; Ritzau-Jost et al., 2021; Rowan, DelCanto, Jianqing, Kamasawa, & Christie, 2016; Vivekananda et  
45 al., 2017). However, the interpretation of these signals are still limited because signal distortions caused by the  
46 recording pipette and amplifier circuits remains elusive (Ritzau-Jost et al., 2021). We reasoned that as  
47 computational modeling allows the precise reconstruction of the native electrical behavior of the most complex

48 neuronal structures (Henrik Alle, Roth, & Geiger, 2009; Beaulieu-Laroche & Harnett, 2018; Branco & Häusser,  
49 2011; Jayant et al., 2017; Kwon, Sakamoto, Peterka, & Yuste, 2017) it should be similarly possible to simulate  
50 the behavior of the recording instruments.

51 With these in mind, we built and tested a realistic model that considers not only the biological structures but also  
52 amplifier and pipette features. With this complex model we simulated actual recording conditions with the aim  
53 of subsequent, simulated removal of the instrumental contributions and distortions from the recorded signals.  
54 Thus, this complex model allowed the correction of the distortions caused by patch-clamp recording instruments  
55 and predict isolated biological signals. We tested the model by predicting the native action potential waveform of  
56 a directly recorded small axonal varicosity. Our simulations showed that recording instrumentation not only filters  
57 the signal, but it directly interferes with native signal generation in small neuronal structures.

## 59 **Results**

### 60 *In silico implementation of amplifier features*

61 We developed and validated a realistic amplifier model working both in voltage clamp (VC) and current clamp  
62 (CC) mode using the NEURON simulation environment (Hines & Carnevale, 1997). The model needed to be  
63 suitable for both VC and CC modes, because instrumental compensations are typically determined in VC mode  
64 during seal formations and these settings are implemented for CC during voltage signals recordings. For precise  
65 implementation of the components of the amplifier circuit, we examined their capacitive and resistive properties  
66 using three test configurations (**Supplementary Figure 1**). The first test configuration was the isolated headstage  
67 in open circuit (test #1), which allowed the characterization of the high frequency boost unit (see below) and the  
68 capacitance compensation of the VC circuitry. Since open circuit measurements are not possible in CC mode, the  
69 circuit was closed via known resistors in the second test configuration (test #2). This configuration allowed the  
70 estimation of stray capacitance associated with the feedback resistor. The third test circuit was a modified model  
71 cell (test #3, type 1U, Molecular Devices), which represents whole-cell recording conditions as it includes an

72 idealized cell and recording pipette with their resistive and capacitive components. In order to explore an extended  
73 range of signal processing capacity of the amplifier, model cell components were varied using custom capacitors  
74 and resistors. This test configuration allowed us to investigate the features of the capacitance neutralization of the  
75 CC circuitry.

76 The construction of our model amplifier initially based on idealized circuit representations, namely a resistive  
77 feedback circuit (a current-to-voltage converter) typical for the VC and a voltage follower circuit (a unity gain  
78 voltage buffer) with an idealized current source for the CC (Sherman-Gold, 2012; Sigworth, 1995; Wilson &  
79 Park, 1989) (Figure 1).

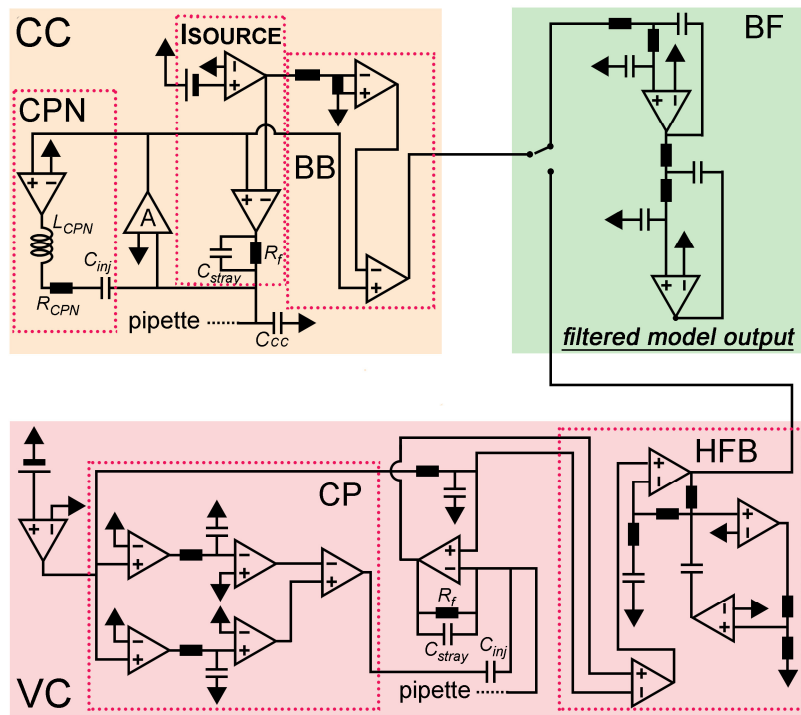

81 **Figure 1. Model amplifier**

82 Schematic circuit diagram of the model amplifier. The current clamp circuit (CC) consisted of a current source (ISOURCE),  
83 an idealized voltage buffer (A), capacitance neutralization (CPN) and bridge balance (BB) circuits. The voltage clamp  
84 circuit (VC) consisted of a resistive feedback amplifier with dual capacitance compensation (CP) and the high frequency  
85 boost circuit (HFB). Outputs of the two amplifier modules are connected to a low-pass filter circuit (BF).

87 Operation of combined voltage- and current-clamp amplifiers requires a capacitor ( $C_{inj}$ ) for current injection in  
88 both VC and CC modes and a resistor ( $R_f$ ) used as current generator in CC and as feedback resistor in VC  
89 (Strickholm, 1995) (**Figure 1**). To create realistic amplifier model, we first measured amplifier responses using  
90 the three test circuits, which were subsequently simulated allowing individual tuning of elementary circuit  
91 parameters. First, we measured  $C_{inj}$ , assuming that the total capacitive load present in the isolated VC circuit (test  
92 #1) corresponds to the injector capacitor. By recording voltage-step-evoked capacitive current responses in open  
93 circuit configuration, we determined that the total capacitive load is 1.615 pF in our amplifier (MultiClamp700B).  
94 As virtually all real resistors,  $R_f$  has a certain amount of parasitic capacitance ( $C_{stray}$ ) which affects the  
95 performance characteristics of the amplifier. We next determined the size of this parasitic capacitance. In CC  
96 mode, the  $C_{stray}$  connected in parallel with the  $R_f$  (see ISOURCE circuit on **Figure 1**) acts as a capacitance-  
97 neutralizing element. However, this neutralizing effect appears only when the input load is considerably smaller  
98 than the  $R_f$  which was set to 500 M $\Omega$  in the real amplifier (**Figure 2A left traces**). To characterize the size of  
99  $C_{stray}$  associated with the  $R_f$ , we adjusted the  $C_{stray}$  in the model to reproduce the evoked voltage responses recorded  
100 with the amplifier in test #2 configuration with 20, 50 and 100 M $\Omega$  input loads (**Figure 2A right traces**). These  
101 simulations revealed 0.38 pF  $C_{stray}$ , thus we used this value in the model.

102 Next, we added the remaining amplifier components to the model one-by-one. First, we focused on the VC  
103 operations whose speed depends on a dedicated high frequency boost circuit (Sigworth, 1995). Amplifier are built  
104 with this compensation mechanism because  $C_{stray}$  substantially reduces the output bandwidth of the feedback  
105 circuit in VC mode (time constant of the capacitive relaxation with the previously determined 0.38 pF  $C_{stray}$ :  
106 191.92  $\mu$ s, **Figure 2B left**). We added a simplified boosting unit tuned to accelerate model responses to the  
107 experimentally observed amplifier speed (3.85  $\mu$ s vs. 3.19  $\mu$ s, real vs. boosted model, **Figures 1 and 2B right**).  
108 Next, we implemented two pipette capacitance compensation circuits in the VC model. Fast capacitance  
109 compensation (CPf, 0-16 pF, 0.5-1.8  $\mu$ s) cancels the majority of  $C_{pip}$ -induced current transients, while the slow  
110 capacitance compensation (CPs, 0-3 pF, 10-4000  $\mu$ s) reduces the slower instrumental capacitive components

111 (Sigworth, 1995) (not equivalent to whole-cell compensation that was not implemented in this model **Figures 1**  
 112 **and 2C**).

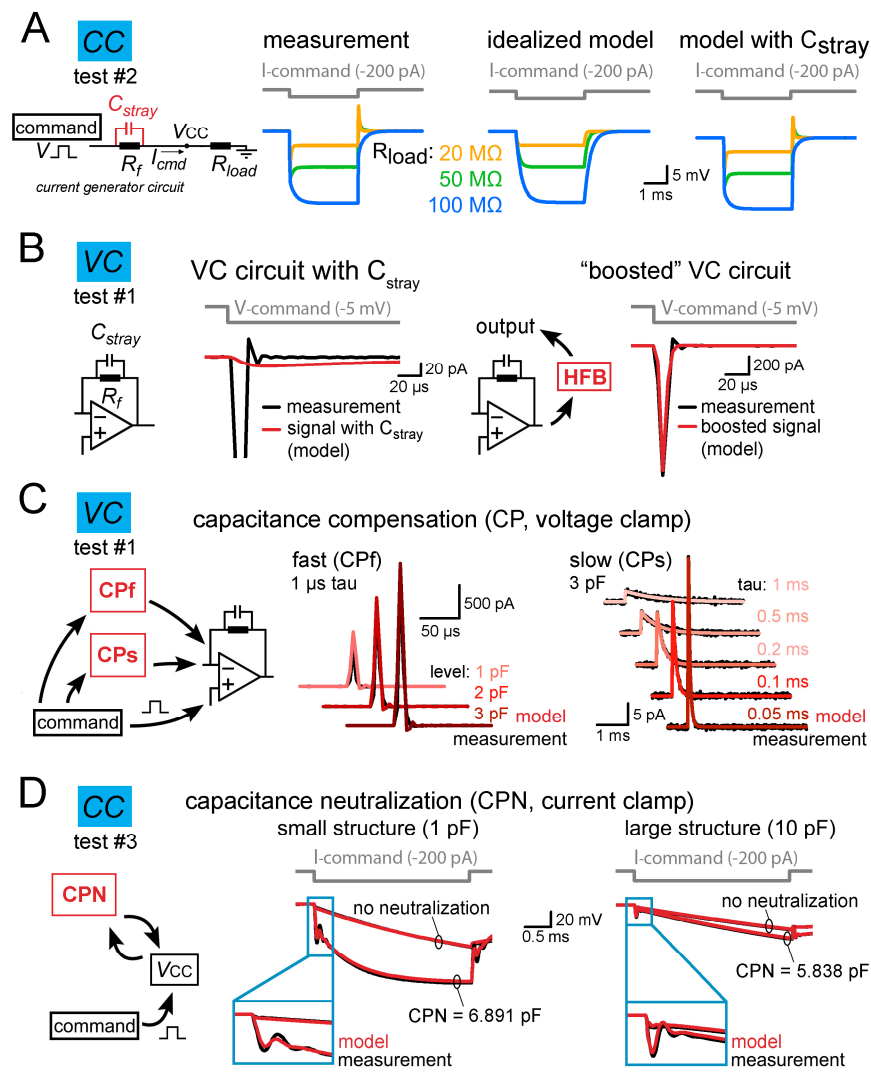

113

114 **Figure 2. Implementation of individual amplifier components with realistic parameters**

115 (A) The stray capacitance ( $C_{stray}$ ) associated with the current passing resistor ( $R_f$ ) was predicted by simulating the voltage  
 116 responses recorded in test #2 configuration.  $C_{stray}$  acts as a capacitance neutralizing element in CC mode. Because the  
 117 capacitance neutralizing effect of  $C_{stray}$  depends on the load resistance ( $R_{load}$ ) attached to the amplifier input ( $V_{cc}$ ), we tested  
 118 three scenarios using 20, 50 and 100 MΩ resistors. The left traces show measured voltage responses evoked by brief current  
 119 injection in the presence of different  $R_{load}$ . Idealized (i.e.  $C_{stray}$  free) model responses are shown in the middle for comparison.  
 120 Right, model responses with 0.38 pF  $C_{stray}$  replicated the observed amplifier behavior.

121 (B)  $C_{stray}$  of  $R_f$  slows down the current responses in the VC model (red trace, left panel). This effect is compensated in the  
 122 actual amplifiers by using high frequency boost circuit (HFB). The implementation of a high frequency boost circuit in the  
 123 model restored the response speed (red trace, right panel).

124 (C) Capacitance compensation in the VC model (red) faithfully replicates the magnitude and the time course of amplifier-  
125 generated compensatory currents (black, test circuit#1) for both the fast (CPf) and slow (CPs) compensations.

126 (D) Comparison of simulated (red) and recorded (black) voltage signals obtained with different capacitance neutralization  
127 (CPN) in CC mode from a small structure (middle panel) and from a large structure (left panel). Notice that the instrumental  
128 CC model faithfully replicates the neutralizing capability of the amplifier and the neutralization associated signal artefacts  
129 regardless of the applied CPN settings.

130  
131 We also implemented two compensatory mechanisms for the CC mode, namely the capacitance neutralization  
132 (CPN) and the bridge balance (BB) compensation (**Figure 1**). The CPN circuit is a positive feedback loop that  
133 feeds the pipette voltage back to the input through the  $C_{inj}$  in order to discharge the pipette capacitance (Sherman-  
134 Gold, 2012; Wilson & Park, 1989). Due to this positive feedback, the recordings are prone to oscillate as CPN  
135 level approaches a fully compensated state. Such evolving oscillation carry information about the intrinsic  
136 behavior of the CPN circuit. Therefore, the oscillating signal (dampening and frequency profile) can be employed  
137 for determining a minimal set of passive circuit elements necessary the re-create the CPN behavior. Specifically,  
138 we measured the maximal possible capacitance neutralization where the recording is still stable using test#3  
139 circuit. Pipette parameters (10M $\Omega$ , 2.8 pF) and the cell-equivalent resistor (500 M $\Omega$ ) was fixed and only the  
140 capacitance of the cell was varied from 0.75 pF to 46.7 pF. The model reproduced the recorded signal artefacts  
141 when a resistor (1.49 M $\Omega$ ) and an inductor (18.3 H) was incorporated to the CPN circuit in series with the  $C_{inj}$   
142 (**Figures 1 and 2D**). Amplifiers are typically supplied with BB compensatory mechanism to eliminate the voltage  
143 drop across the access resistance (Araki & Otani, 1955; Sherman-Gold, 2012). In the model, we subtracted a  
144 scaled version of the command signal from the recorded voltage (**Figure 1**). We also extended our model with a  
145 four-pole low-pass Bessel filter unit with adjustable cutoff frequencies from 0.5 kHz to 100 kHz (**Figure 1**).

146 Altogether, by using a measurement-based approach we created an amplifier model, in which both the VC and  
147 CC operation and their specific compensatory capabilities show realistic behavior.

### ***Pipette implementation considers the observed nonuniform $C_{pip}$ and $R_{pip}$ distributions***

Next, we focused on the accurate implementation of patch pipettes. To properly characterize the distribution of resistance along patch pipettes that are suitable for recordings from small axons, we repeatedly broke small pieces from the end of the pipettes and determined the resistance as a function of tip distance (**Figure 3A**,  $n = 55$  resistance measurement). In agreement with the theoretical considerations (Benndorf, 1995; Ying et al., 2002), we found that pipette resistance drops sharply after the tip, falling below one  $M\Omega$  within the first millimeter ( $0.33 \pm 0.18 M\Omega$  for measurements with tip distance over 1 mm,  $n=20$  measurement). To determine the capacitance distribution of our pipettes we systematically varied the immersed length of the pipettes in the recording solution and measured the capacitance, which corresponds to the cumulative capacitance of the dipped part (Cornwall & Thomas, 1981) (**Figure 3A**,  $n = 656$  capacitance measurement). The cumulative capacitance increased within the first 3 mm from the tip, whereas the remaining part of the pipette had only moderate contribution to the total capacitance suggesting inhomogeneous capacitance distribution along pipettes ( $0.03 \pm 0.07$  pF,  $2.52 \pm 0.3$  pF and  $3.1 \pm 0.25$  pF at 0.1 mm, 3 mm and 7 mm tip distances respectively,  $n=39, 40$  and  $38$  measurements, **Figure 3A**). A key parameter that defines the pipette capacitance is the ratio of the outer and inner pipette diameters ( $R_{OI}$ ) (Benndorf, 1995; Cornwall & Thomas, 1981). One potential explanation for the inhomogeneous capacitance distribution is that the  $R_{OI}$  is not constant along the pipette but it decreases toward the tip. To test this possibility and verify the predictions of the capacitance distribution measurement, we directly measured the  $R_{OI}$  of the recording pipettes. In order to precisely measure the edge of the pipette walls and avoid optical distortions by the curved glass walls, we carefully split the pipettes using a custom-built grinding system and measured their inner and outer diameters along the longitudinal axis (**Figure 3B**, see Methods section for details). Consistent with the dipping measurements,  $R_{OI}$  decreased toward the tip ( $R_{OI} < 2\text{mm} = 1.6 \pm 0.02$  vs.  $R_{OI} > 5\text{mm} = 2.04 \pm 0.02$ ,  $n = 4$  pipettes) explaining the larger contribution of the tip region to the total pipette capacitance.



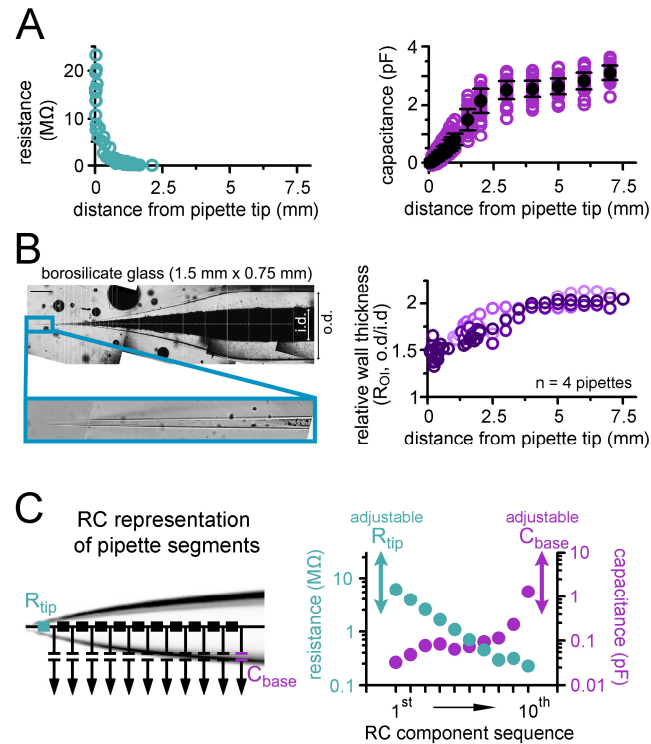

172

### 173 **Figure 3. Implementation of pipettes with non-uniform $C_{pip}$ and $R_{pip}$ distributions**

174 (A) Pooled data of  $R_{pip}$  (left graph) and  $C_{pip}$  (right graph) as a function of tip distance.

175 (B) A representative imaging plane that was used for the measurement of the relative wall-thickness ( $R_{o,i}$ ) that is, the ratio  
176 of outer and inner diameter (o.d. and i.d., respectively) of the pipettes. Scale bar: 0.5 mm. Graph on the right shows that the  
177 wall of the pipettes is much thinner toward the tips (i.e. the inner diameter is larger than predicted from the  $R_{o,i}$  of the original  
178 glass; the 4 measured pipettes are shown in different shades of purple).

179 (C) Pipettes were implemented as 10 independent RC units, a resistor ( $R_{tip}$ , on the left) and a capacitor ( $C_{base}$ , on the right).  
180 The two latter components allow the adjustment of the model to fit the differences of  $R_{pip}$  and  $C_{pip}$  of individual pipettes.  
181 Graph on the right indicates the actual capacitance (purple) and resistance (green) values of the 10 fixed RC motifs.

182

183 Based on these measurements, we created the skeleton of a “prototypical” patch pipette model from 10 RC units  
184 to consider the inhomogeneous distribution of capacitance and resistance (**Figure 3C**). Model pipette parameters  
185 can be adjusted to account for variability across individual pipettes using an additional resistor placed to the tip  
186 and a capacitor placed to the back to tune the  $R_{pip}$  and  $C_{pip}$  of individual pipettes.

187

## 188 ***Reconstitution of the native electrical behaviour of a small axon***

189 To test the efficacy of the complex instrumental model in predicting undisturbed fast neuronal membrane  
190 responses from distorted recordings, we used patch-clamp data from a small ( $<1\ \mu\text{m}$ ) *en passant* axonal varicosity  
191 of an identified hippocampal mossy fiber axon (MF, **Figure 4A**). Recordings from submicron-sized neuronal  
192 structures are supposedly substantially distorted as they can be patched only with high access resistance and their  
193 capacitance is in the range of the remaining uncompensated instrumental capacitance.

194 The experimental conditions needed to be realistically modeled, including the precise morphology and electrical  
195 properties of the biological structure and the instrumental conditions (**Supplementary Figure 2**, see Methods for  
196 details). First, we characterized the total instrumental capacitance ( $C_{\text{tot}}$ , the sum of all amplifier-, holder- and  
197 pipette-related capacitances) present in the actual recording (**Figure 4A**,  $C_{\text{tot}}$  : 7.097 pF from which 3.23 pF is the  
198  $C_{\text{pip}}$  and 2 pF is the capacitance of the pipette holder). Target trace for this estimation was recorded using both  
199 fast and slow pipette capacitance compensation of the amplifier with the highest frequency resolution (output  
200 filter was bypassed) and we set the model accordingly.

201 Next, we precisely reconstructed the morphology of the biocytin-labelled and fluorescently recovered MF axon  
202 because signal propagation strongly depends on the length, diameter and their inhomogeneties of the biological  
203 structures (Goldstein & Rall, 1974; Manor, Koch, & Segev, 1991) (**Figure 4B**). As it is characteristic for  
204 hippocampal mossy fibers the 519  $\mu\text{m}$  long reconstruction of the recorded MF included large ( $>3\ \mu\text{m}$ ) terminals,  
205 filopodial extensions and small ( $<1.5\ \mu\text{m}$ ) *en passant* varicosities within the *stratum lucidum* of the CA3 area  
206 (Acsady, Kamondi, Sık, Freund, & Buzsáki, 1998; Rollenhagen et al., 2007).

207 We next determined the cable properties; specific membrane resistance ( $R_m$ ), membrane capacitance ( $C_m$ ), and  
208 intracellular resistivity ( $R_i$ ) of the particular axon. For this, we optimized the model to the experimentally recorded  
209 voltage responses evoked by short and long current stimuli (**Figure 4C**) (Nörenberg, Hu, Vida, Bartos, & Jonas,  
210 2010; Roth & Häusser, 2001; Schmidt-Hieber, Jonas, & Bischofberger, 2007; Szoboszlay et al., 2016). The  
211 advantages of the complex (instrumental + biological) model became obvious in these fittings. Pipette artefacts

212 can markedly contaminate the onset of the evoked responses upon current injection (Major, Larkman, Jonas,  
 213 Sakmann, & Jack, 1994). The incorporation of the complete experimental instrument to the model precisely  
 214 reproduced these stimulus artefacts, therefore, allowing us to isolate biological contributions and obtain the  
 215 passive cellular parameters. The predicted cellular parameters ( $R_m = 60.0 \text{ k}\Omega \cdot \text{cm}^2$ , a  $C_m = 0.65 \text{ }\mu\text{F} \cdot \text{cm}^{-2}$  and  $R_i$   
 216  $= 147.3 \text{ }\Omega \cdot \text{cm}$ ) match with the data reported for MFs using recordings from large terminals (S. Hallermann,  
 217 Pawlu, Jonas, & Heckmann, 2003). It is important to note that the similarities of the simulated and recorded fast  
 218 voltage transients further verify our complex model.

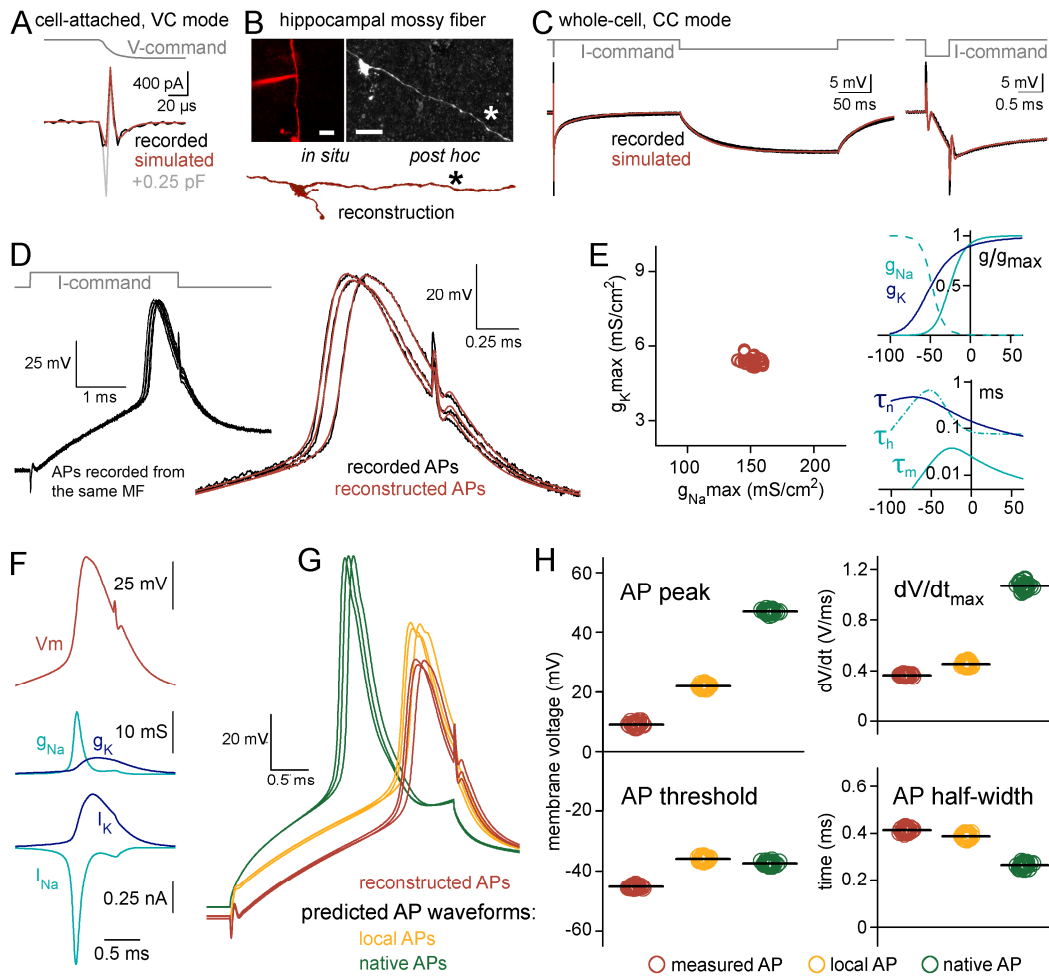

219

220 **Figure 4. Reconstitution of the undisturbed membrane dynamics of a recorded axon**

221 (A) Current responses to -20 mV voltage steps recorded from the axonal membrane in on-cell mode (black) and in the model  
 222 with 7.097 pF (red) and 7.347 pF (grey)  $C_{\text{tot}}$ . Notice the sensitivity of simulated responses to small differences in the  
 223 instrumental capacitance applied in the model.

224 (B) Confocal z-stack images show the recorded axon at the end of the experiment (left) and after the anatomical recovery  
225 (right). Bottom, part of the reconstructed morphology. Asterisks mark the recording position. Scale bars: 10  $\mu\text{m}$

226 (C) Voltage responses in the recorded axon (black) and in the passive cable model with the added instrument (red) to short  
227 (3 ms,  $-50$  pA) and long (250 ms,  $-2.5$  pA) current stimuli. The short pulse is shown at an expanded timescale on the right.

228 (D) Recorded (black) and simulated APs (red) evoked by brief (3 ms, 86 pA) current stimuli. APs were simulated in the  
229 complex model that included the instrument, the passive cable and Hodgkin-Huxley type sodium and potassium  
230 conductances.

231 (E) Left, distribution of optimal maximal  $\text{Na}^+$  ( $g_{\text{Na}_{\text{max}}}$ ) and  $\text{K}^+$  ( $g_{\text{K}_{\text{max}}}$ ) conductance densities obtained from 30 recorded  
232 and independently fitted APs. Right, averaged gating properties and voltage dependence of the conductances that were  
233 resulted in by the fits that recreated the recorded APs.

234 (F) Simulated AP waveform (top) with the underlying conductances (middle,  $g_{\text{Na}}$  and  $g_{\text{K}}$ ) and the modeled ionic currents  
235 (bottom,  $I_{\text{Na}}$  and  $I_{\text{K}}$ ).

236 (G) The simulations with the confirmed conductance sets allowed to see the waveforms of the same APs not only within  
237 the pipette (red, corresponding to measured APs) but also the simultaneous AP waveforms within the axon (orange,  
238 corresponding to local APs) and, after the removal of the recording instrument from the model, the native, undisturbed AP  
239 waveforms (green).

240 (H) Differences in waveform parameters of measured, local and native APs. Individual points show the peak, threshold,  
241 maximum rate of the rise ( $dV/dt_{\text{max}}$ ) and half-width of 30 independently simulated APs in the three points of view. Horizontal  
242 black lines indicate mean values.

243

244 Next, we simulated the active ionic mechanisms underlying the recorded AP waveforms. APs were evoked with  
245 brief current stimuli (**Figure 4D and E**, 3 ms, 86 pA). To simulate APs we tuned Hodgkin-Huxley-type sodium  
246 and potassium conductances (Hodgkin & Huxley, 1952) (modified version of the built-in mechanism in the  
247 NEURON simulation environment). Optimization of the density, kinetics and voltage dependence resulted in AP  
248 waveforms closely matching to the recorded ones (absolute AP peak:  $9.0 \pm 0.12$  mV vs.  $9.28 \pm 0.12$  mV, recorded  
249 vs. simulated APs, respectively, AP half-width:  $0.52 \pm 0.002$  ms vs.  $0.52 \pm 0.002$  ms., AP threshold:  $-45.28 \pm$   
250  $0.07$  mV vs.  $-44.27 \pm 0.16$  mV, maximum rate of rise:  $363.26 \pm 0.93$  vs.  $432.27 \pm 3.56$ ,  $n = 30$  APs; **Figure 4D**).

251 This suggest that the complex instrumental model in combination with traditional conductance functions is  
252 sufficient to reconstruct the recorded AP waveforms from potentially distorted recordings. Importantly, although

each of the target APs was fitted independently, the optimal model conductance parameters were confined to a narrow range within the parameter space (coefficient of variation = 3% for both the Na<sup>+</sup> and K<sup>+</sup> conductance predictions, maximal g<sub>Na</sub> density: 151.7 ± 5.23 mS/cm<sup>2</sup>, maximal g<sub>K</sub> density: 5.41 ± 0.16 mS/cm<sup>2</sup>, n = 30; **Figure 4E**) indicating that the optimization provided a unique solution for the experimental data. Analysis of the error between the fit and its target data in different Na<sup>+</sup> and K<sup>+</sup> conductance combinations also revealed a single minimum that coincided with the best fit parameter combinations (**Supplementary Figure 3**). Furthermore, the optimal conductance parameters (i.e. their maximal conductance levels, their voltage dependence, and their activation and inactivation time constants), as well as the resulted ionic currents, are similar to previously described mechanisms underlying cortical axonal APs at near-physiological temperature (Henrik Alle et al., 2009; Geiger & Jonas, 2000; Stefan Hallermann, De Kock, Stuart, & Kole, 2012; Schmidt-Hieber & Bischofberger, 2010) (H. Alle, Kubota, & Geiger, 2011; Engel & Jonas, 2005; Hu & Jonas, 2014) (**Figure 4 E and F**), confirming the validity of our AP-reconstitution approach.

The relatively high series resistance (R<sub>access</sub>) in the recording (modeled R<sub>access</sub>: 53.2 ± 1.02 MΩ in the AP reconstitution simulations) can result in significant pipette filtering. The complex model, however, allowed us to investigate not only the APs recorded through the pipette but also the local spike that occurred within the axon while it was patched (**Figure 4G**). These local APs are not affected by the filtering effect caused by the pipette, so we could directly quantify filtering effects by comparing the *local* and *recorded* axonal AP waveforms (**Figure 4H**). Because of the filtering, local spikes had larger peak amplitudes and faster time course than the recorded APs (absolute peak: 21.95 ± 0.12 mV vs. 9.0 ± 0.12 mV, local vs. measured AP, respectively,  $p = 6.88 \cdot 10^{-60}$ ,  $t(29) = -552.75$  paired sample t-test, n = 30 APs, half-width: 0.48 ± 0.002 ms vs. 0.52 ± 0.002 ms, local vs. measured AP, respectively,  $p = 1.99 \cdot 10^{-17}$ ,  $t(29) = 18.23$ , paired sample t-test, n = 30 APs, **Figure 4H**). As expected, the maximal rate of rise (dV/dt<sub>max</sub>) during the upstroke of spikes was the most different between local and measured APs as it is the most sensitive to low-pass filtering introduced by the pipette (453.11 ± 2.54 V/s vs. 363.26 ± 0.93 V/s, respectively,  $p = 4.69 \cdot 10^{-29}$ ,  $t(29) = -47.5$ , paired sample t-test, n = 30 APs, **Figure 4H**).

277 Altogether, these observations are in agreement with the expected filtering, which affects fast signals, such as the  
278 axonal APs more prominently.

279 Our model predicts that APs of the small MF bouton had lower peak and slower kinetics than APs measured from  
280 large MF terminals (Henrik Alle et al., 2009; Geiger & Jonas, 2000). These observed differences could derive  
281 either from biological variability among the subcellular compartments or from the larger deteriorating  
282 instrumental impact on the local membrane of the smaller axon. To discriminate between these possibilities, we  
283 investigated the *native* AP parameters predicted by the model. In this arrangement, we run the modeled biological  
284 structure with the reconstructed model conductances but the recording instruments was removed (**Figure 4G and**  
285 **H**). Thus, we predict how the native APs would look if the recording instrument was not present. We found that  
286 the native APs reached more depolarized peak potential ( $46.9 \pm 0.09$  mV,  $p = 2.27 \cdot 10^{-48}$ ,  $t(29) = 221.43$ , *paired*  
287 *sample t-test*,  $n = 30$  APs) and were significantly faster (half-width:  $0.33 \pm 0.002$  ms,  $p = 1.36 \cdot 10^{-33}$ ,  $t(29) = -$   
288  $68.3$ , *paired sample t-test*;  $dV/dt_{\max}$ :  $1064.81 \pm 5.1$  V/s,  $p = 3.75 \cdot 10^{-45}$ ,  $t(29) = 171.47$ , *paired sample t-test*,  $n =$   
289  $30$  APs) compared to the local spikes modeled with the experimental rig. The obtained native AP parameters were  
290 similar to those reported from large MF boutons, suggesting that the different AP shape observed in the small MF  
291 recording is primarily attributable to the presence of the measuring system.

292 Altogether, these results show that it is possible to obtain the native and local AP properties and the plausible  
293 underlying mechanisms using a complex instrumental model.

### 295 ***Modeling the recording instruments accurately predicts signal distortions and native AP shapes***

296 We used additional experiments to verify the reliability and plausibility of the model predictions. Specifically,  
297 we recorded APs with three different capacitance neutralization settings from the same axon and tested whether  
298 it alters the output of the model (CPN=6.5, 7 and 7.384 pF **Figure 5A**). Sub-optimal CPN conditions affects the  
299 recorded signal in several ways (**Supplementary Figure 4**). The simulations reproduced the recorded APs with  
300 different level of distortions when the CPN in the model was adjusted accordingly (**Figure 5A**). In addition, the

301 predicted underlying sodium and potassium conductances were also very similar ( $g_{Na}$  density:  $159.02 \pm 1.73$   
 302  $mS/cm^2$ ,  $151.7 \pm 0.95 mS/cm^2$ ,  $160.03 \pm 1.47 mS/cm^2$ ,  $g_K$  density:  $5.83 \pm 0.05 mS/cm^2$ ,  $5.41 \pm 0.03 mS/cm^2$ ,  $6.32$   
 303  $\pm 0.09 mS/cm^2$ ;  $n = 30$ ,  $n = 30$  and  $n = 28$  for CPN = 6.5 pF APs, CPN = 7 pF APs and CPN = 7.386 pF APs,  
 304 respectively, **Figure 5B** and **Supplementary Figure 5**).

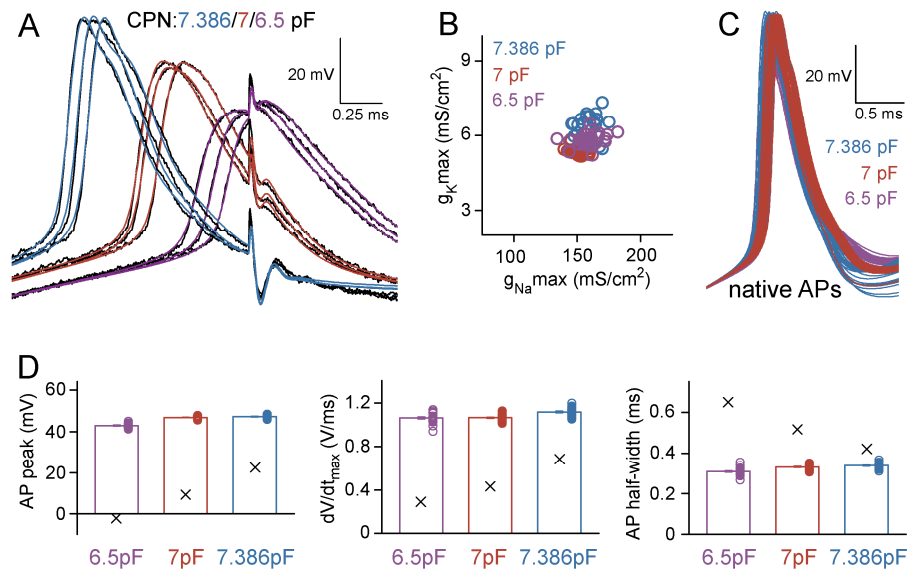

305

306 **Figure 5. APs recorded and simulated from the same axon under different instrumental distortions predicted similar**  
 307 **native spike shapes**

308 (A) Representative target APs (black) and their best-fit representations in the complex instrument+axon model with  
 309 standard CPN settings (red, 7 pF), with slightly reduced CPN (purple, 6.5 pF) or with the highest attainable CPN level (blue,  
 310 7.386 pF).

311 (B) The best-fit  $g_{Na_{max}}$  and  $g_{K_{max}}$  were similar from APs with different CPN levels ( $n=30$ , 30 and 28 target APs).

312 (C) The native AP waveforms retrieved from APs with different CPN levels were also similar.

313 (D) Peak, maximal  $dV/dt$  and half-width of the native APs predicted based on recordings with three different CPN settings.  
 314 Columns show the averages of the native APs, while X denotes the averages of the experimentally measured parameters  
 315 ( $n=30,30$  and 28 APs) which were distorted by the instruments.

316

317 Importantly, not only the predicted AP shapes matched but the native APs were also similar despite of the different  
 318 levels of distortions in the three independent original recording conditions (absolute AP peak:  $43.0 \pm 0.17 mV$ ,  
 319  $46.9 \pm 0.09 mV$ ,  $47.2 \pm 0.14 mV$ , AP half-width:  $0.31 \pm 0.003 ms$ ,  $0.33 \pm 0.002 ms$ ,  $0.34 \pm 0.003 ms$ ;  $n=30$ ,  $n=30$ ,

n=28 for CPN=6.5 pF APs, CPN=7 pF APs and CPN=7.386 pF APs, respectively; **Figure 5C and D**). For an additional verification, we tested whether the model provides consistent predictions of AP propagation across conductance sets derived from different recording configurations. Specifically we simulated the natural AP conduction of distally evoked APs to the original recording site (423  $\mu\text{m}$  away, **Figure 6A**) and measured the speed of propagation and the shape of the incoming APs. The incoming propagating APs were similar (absolute AP peak:  $61.73 \pm 0.13$  mV,  $64.22 \pm 0.07$  mV,  $65.48 \pm 0.08$  mV, AP width at -10 mV:  $0.34 \pm 0.003$  ms,  $0.36 \pm 0.002$  ms,  $0.33 \pm 0.002$  ms; n=30, n=30, n=28 for CPN=6.5 pF APs, CPN=7 pF APs and CPN=7.386 pF APs, respectively; **Figure 6**).

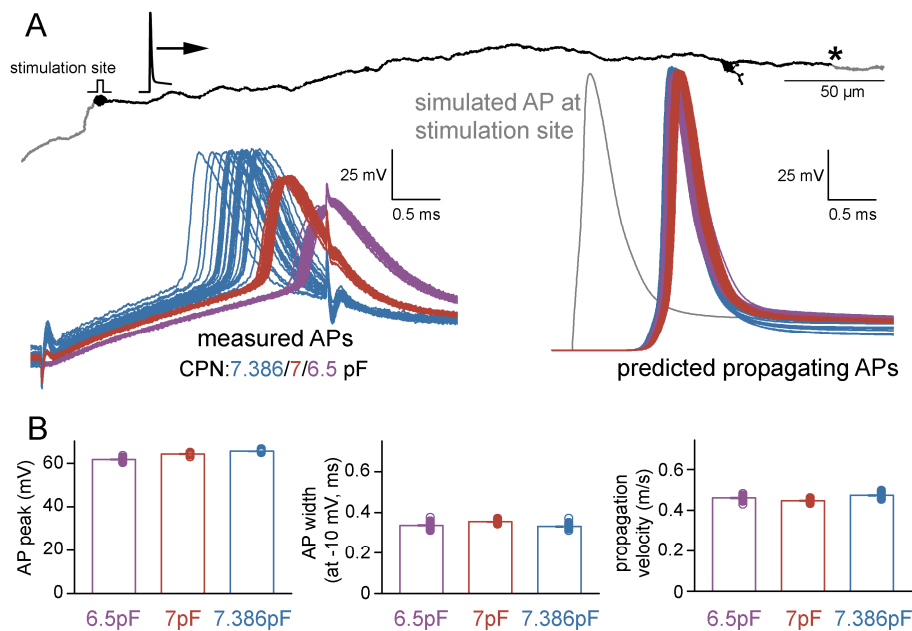

328

### 329 **Figure 6. Characteristics of propagating native APs**

330 (A) The reconstructed and simulated axonal structure with the position at which native AP parameters were captured  
331 (indicated with asterisk) after distal AP initiation (stimulation site) in individual models that were optimized for different  
332 recording conditions. Left, 88 original AP recordings that were used for the AP optimization in the models and recorded  
333 individually with three different CPN settings (n=30, 30 and 28 with 6.5, 7 and 7.368 pF CPN, respectively). The retrieved  
334 conductance sets were applied to the complete axon individually in all 88 cases. The right panel shows the 88 native,  
335 propagating simulated APs at the indicated distal point along the axon. The color is as for the measured APs on the left. A  
336 simulated AP at the stimulation site is shown in gray.



(B) Peak, width at -10 mV and propagation velocity of the distally initiated propagating APs retrieved from 88 individual simulations. Note that conventional AP half-width measurements can not be applied for propagating APs because of the altered apparent threshold.

The prediction of AP propagation velocity is particularly sensitive to model parametrization as the speed of axonal spike propagation strongly depends both on the morphological properties of the axon and the specific passive and active mechanisms of the axonal membrane. Consistent with previous measurements in hippocampal MFs (Henrik Alle et al., 2009; Kress, Dowling, Meeks, & Mennerick, 2008), all model configuration predicted similar propagation speed ( $0.46 \pm 0.002 \text{ m}\cdot\text{s}^{-1}$ ,  $0.45 \pm 0.001 \text{ m}\cdot\text{s}^{-1}$ ,  $0.47 \pm 0.002 \text{ m}\cdot\text{s}^{-1}$ ; **Figure 6B**).

Taken together, these results confirm that complete representation of the recording instruments in a model is sufficient for generating plausible native signals and underlying membrane mechanisms from signals that are distorted by the recording apparatus.

### *Instrumental and structural parameters jointly define signal distortion in recordings from small neuronal structures*

In addition to providing a useful tool for predicting and correcting instrumental distortions our simulations confirmed that complete elimination of the instrumental disturbance was not possible during recordings (Ritzau-Jost et al., 2021), since substantial difference persists between the measured and native APs, even when the capacitance compensation reached the maximally attainable level (see **Figure 5C**). The model raised the possibility that inadequate local signal generation also significantly contribute to the alterations in AP shapes in addition to filtering that affects recordings through patch pipettes. We refer to this effect as observer effect based on the analogy with the concept introduced in the field of physics for situations where the measurement inevitably changes the measured parameter. The observer effect can be quantified as the difference between local APs (signals in the structure when pipette is present) and native APs (signals without the presence of any instrument, **Figure 4G and H**). We quantified the relative contribution of filtering and observer effects to the total

362 instrumental distortion in different experimental situations. Specifically, we varied pipette parameters,  
363 compensation settings and the size of the recorded cell (size was set to as  $C_{\text{cell}} = 1$  pF and 10 pF, corresponding  
364 to the size of axons or small caliber dendrites and small cell bodies, respectively) in a reduced model which  
365 included only a single neuronal compartment with the instrumentation and compared the half-widths of APs  
366 (Figure 7). First, we isolated the filter effect by comparing simultaneous AP signals in the pipette and in the cell  
367 (measured versus local AP).

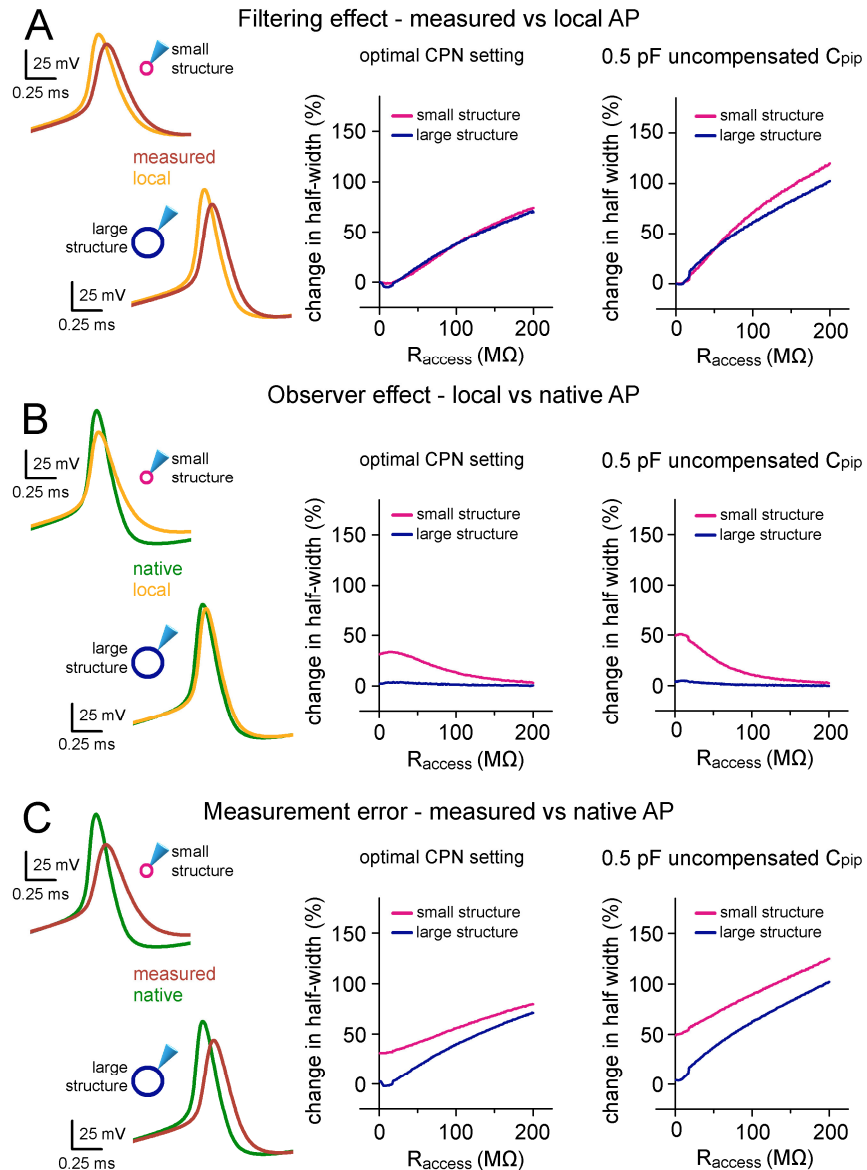

368

369 **Figure 7. Instrumental and structural parameters cooperatively determine signal distortions in recordings from**  
370 **small neuronal structures**

371 (A) On the left, the differences between the waveforms of the same APs within the pipette (measured) and in the two  
372 hypothetical cells (local) highlight the filtering effect of  $70 \text{ M}\Omega$   $R_{\text{access}}$ . Only the size of the membrane surface were different  
373 in the two spherical structures, resulting in 1 and 10 pF biological capacitance, which correspond to small axonal and small  
374 somatic recordings. Graph in the middle summarizes the filtering effect quantified as the difference in AP half-width over  
375 a wide range of  $R_{\text{access}}$  in the small and large spherical cells. The right graph summarizes the filtering effect in simulations  
376 where suboptimal capacitance neutralization was applied (6.3 pF instead of 6.8 pF).

377 (B) Using the same simulation environment as in panel A, the observer effect was quantified as the difference between the  
378 local AP and the native AP waveform. Thus, this data represents the isolated influence of the instrument on local signal  
379 generation.

380 (C) To quantify the measurement error we demonstrate the difference between the measured AP and the native AP waveform  
381 in the same conditions as above. Thus, this is the sum of the filtering and observer effects.

382

383 In accordance with the general notion (Barbour, 2014), high  $R_{\text{access}}$  significantly filters fast voltage transients and  
384 allowed faithful measurement only in a confined  $R_{\text{access}}$  range ( $R_{\text{access}}$  that causes 10% AP signal widening: 47  
385  $\text{M}\Omega$  for small cell and 41  $\text{M}\Omega$  in case of larger cell; **Figure 7A**, left). Furthermore, when uncompensated  
386 capacitance was added to the circuit by reducing the applied capacitance neutralization (-0.5 pF), the recording  
387 became more vulnerable and reliable recordings needed better  $R_{\text{access}}$  ( $R_{\text{access}}$  with 10% distortion: 20  $\text{M}\Omega$  for  
388 small cell and 17  $\text{M}\Omega$  in case of larger cell; **Figure 7A**, right).

389 Next, we isolated the observer effect by comparing the local and native AP shapes with or without the presence  
390 of the recording instrument (**Figure 7B**). The observer effect was always negligible in the case of the larger  
391 simulated biological structure as the capacitance added by the pipette was insignificant compared to the cellular  
392 parameters. In contrast, when the structure was smaller the structure had to discharge the remaining instrumental  
393 capacitance, which was in in this case in the range of  $C_{\text{cell}}$ , resulting in significant observer effect on the recorded  
394 AP shape (**Figure 7B**). Consistent with this hypothesis, observer effect was larger in simulations with additional  
395 uncompensated  $C_{\text{pip}}$  (mean change in AP half-width in the  $R_{\text{access}}$  range of 1-50  $\text{M}\Omega$ :  $31.03 \pm 0.32$  % vs.  $40.54 \pm 1.14$   
396 %, optimal CPN vs. CPN with 0.5 pF uncompensated  $C_{\text{pip}}$ , respectively; **Figure 7B**). Intriguingly, the observer  
397 effect showed a reversed dependence on the  $R_{\text{access}}$ . It was the most pronounced when  $R_{\text{access}}$  was low. The larger

398  $R_{\text{access}}$  presumably isolates the residual instrumental capacitance from the cell and consequently weakens the  
399 instrumental impact.

400 Finally, by comparing the measured and native signals we assessed the overall measurement error. In case of the  
401 larger simulated structure, the overall measurement error is dominated by the filtering effect (**Figure 7C**). In  
402 contrast, when  $C_{\text{cell}}$  is small, the observer effect contributes significantly to the total error. Interestingly, the  
403 complementary changes in the two effects make these recordings less sensitive to changes of  $R_{\text{access}}$  and the error  
404 is similar when the  $R_{\text{access}}$  is low or high (**Figure 7C left**). The results confirm that residual uncompensated pipette  
405 capacitance further deteriorate the difference between native and measured AP signals (**Figure 7C left**). Similar  
406 conclusions can be drawn regarding other AP parameters as well (**Supplementary Figure 6**). Altogether, these  
407 model simulations demonstrated that measurement errors in patch-clamp recordings depend not purely on the  
408 pipette parameters but the size of the recorded structure itself has influence on the signal distortion.

409 Finally, to confirm the above findings on the error sources in a native biophysical structure we repeated the above  
410 tests in a reconstructed MF that was labeled during somatic recording that ensured more intact axonal arborization  
411 (**Figure 8A**). In this case the simulations ran with fixed instrumental parameters (6.74 pF  $C_{\text{tot}}$  and 60 M $\Omega$   $R_{\text{access}}$ ,  
412 with 6.8 pF capacitance neutralization and 60 M $\Omega$  bridge balance correction; **Figure 8A, B and C**). We evoked  
413 APs along the axon and compared the pipette measured, local and native AP waveforms to determine the  
414 contribution of the observer and filtering effects to the instrumental signal distortion and their dependence on the  
415 local biophysical environment (**Figure 8A, B and C**). In agreement with the single compartment simulations  
416 (**Figure 7**), observer effect had a major contribution to the overall measurement error (change in AP half-width:  
417  $7.02 \pm 1.02$  %,  $34.03 \pm 4.59$  % and  $43.26 \pm 4.51$  % for pipette filtering, for observer effect and for total  
418 measurement error, respectively,  $n=941$  locations; **Figure 8A, B and C**). As it is expected from the fixed  
419 instrumental parameters, pipette filtering was similar in small and large diameter sections of the axon. In contrast,  
420 the size of the observer effect was much larger in smaller axonal structures. Consequently, the measurement error  
421 was also the largest in the smallest diameter sections (**Figure 8B**). Importantly, minima in observer effect coincide  
422 with larger local capacitance, which originate from the large mossy fiber boutons in the CA3 area and branching

423 points in the hilus. Indeed, the overall measurement error showed similar inverse correlation to local capacitance  
 424 ( $R^2=0.68$ , power) as the observer effect ( $R^2=0.75$ , power) while the pipette filtering was structure-independent  
 425 (**Figure 8D-F**). These findings confirm that measurement error critically depends on the local biophysical  
 426 environment.

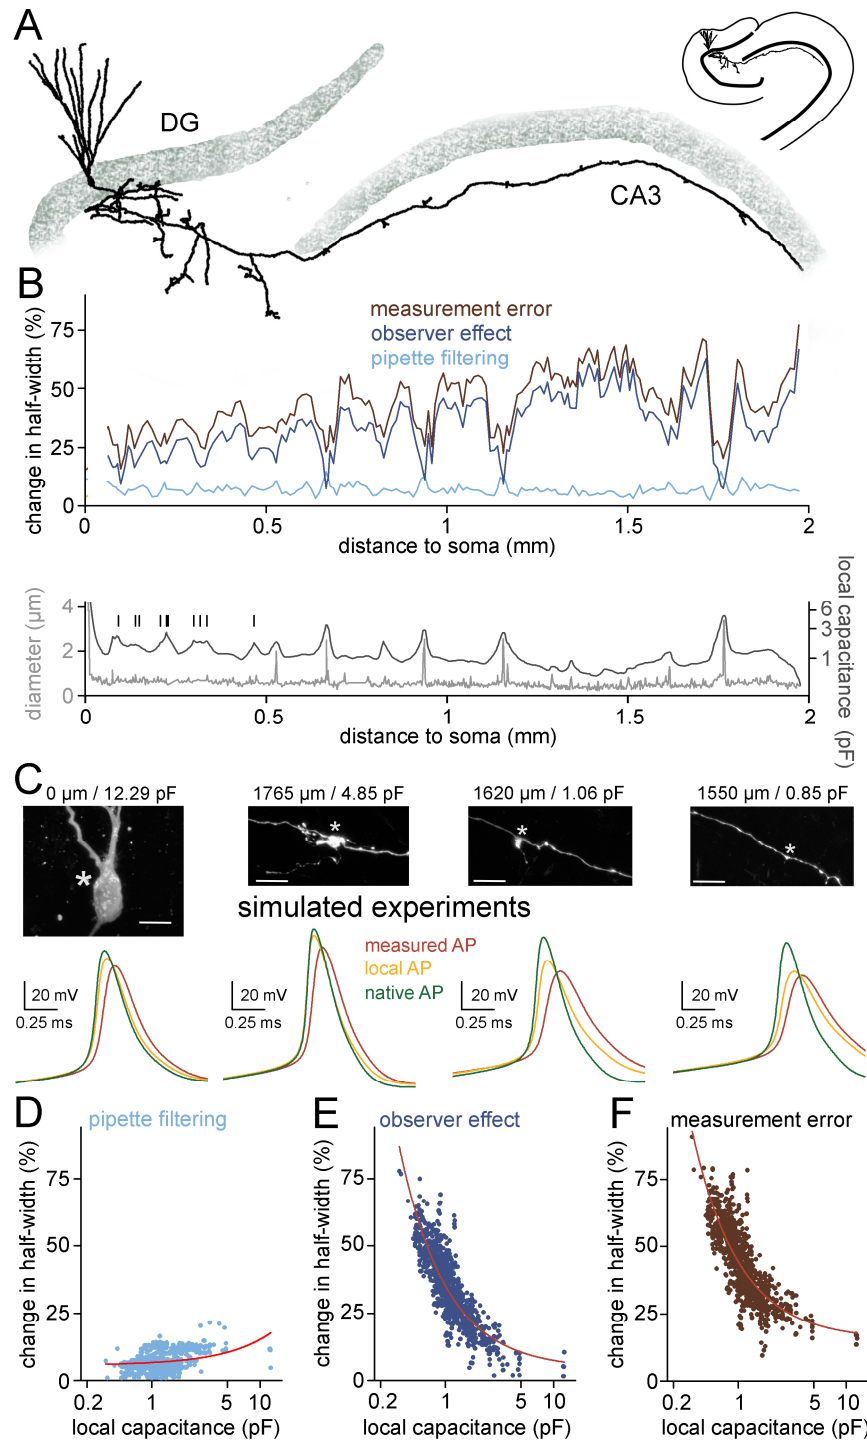

427

428 **Figure 8. Measurement error along the axon is inhomogeneous and depends on the local biophysical environment**

- 429 (A) Morphology of a somatically labeled complete granule cell that was used for simulating hypothetical recordings along  
430 its axon.
- 431 (B) Top, observer- and filtering effects (dark blue and light blue, respectively) together with the overall measurement error  
432 (brown) in simulated axonal measurements plotted against the somatic distance of the recording position. Each value  
433 represent average of 5 individual measurements in each 10  $\mu\text{m}$  segments. Bottom, axonal diameter (grey) and local  
434 capacitance (black) as a function of somatic distance. Vertical bars indicate the branch points of hilar axon collaterals.  
435 Notice that signals that derive from axonal segments that are closer to the soma are less affected by the observer effect due  
436 to the capacitive “load” of the somatic membrane.
- 437 (C) Representative simulated recordings from the soma and different axonal sites and confocal images of the simulated  
438 recording site (same cell as in panel A). Corresponding somatic distances and local capacitances are indicated on the top.  
439 Asterisks mark the recording positions in the simulations. Scale bar=10  $\mu\text{m}$ .
- 440 (D) The filtering effect showed only weak correlation with the local axonal capacitance ( $n = 941$  simulated recordings,  $R^2$   
441 = 0.13, linear fit). Circles represent the filtering effect at independent measurement sites along the same axon. Note the  
442 logarithmic scale of the x-axis.
- 443 (E) The observer effect showed significant correlation with local axonal capacitance ( $n = 941$  simulated recordings,  $R^2 =$   
444 0.75, fitted with power function).
- 445 (F) Correlation between the total measurement error and the local axonal capacitance ( $n = 941$  simulated recordings,  $R^2 =$   
446 0.68, fitted with power function).

447

## 448 **Discussion**

449 Here we developed a measurement-based, highly realistic model representation of the recording instrument that  
450 faithfully replicates actual patch-clamp recordings when combined with the detailed morphological reconstruction  
451 of the recorded structure. Simulation of the complete experimental condition allows for eliminating the  
452 instrumental distortions that are inevitably contaminates signals from small neuronal processes, such as axons.  
453 This realistic model also enabled us to determine the extent and sources of perturbations that contaminate  
454 electrophysiological signals. The results showed that physical parameters of the measuring instrument and the  
455 local biophysical properties of the recorded structure and their quantifiable interactions define the errors in voltage

456 measurements. Consequently, signal deterioration potentially arise from the altered local signal generation instead  
457 of pipette filtering in small axonal recordings.

458 The core hypothesis behind our study is that realistic *in silico* representation of recording instruments together  
459 with the detailed morphology and biophysics of the recorded structure provide a better understanding of signal  
460 distortions present in direct voltage recordings and offers an applicable offline approach to predict native signals  
461 from distorted recordings. The combined simulation of the experimental conditions and the morphology was  
462 proved previously to be an ideal tool to describe technical limitations associated with VC measurements and to  
463 correct the recorded signals from those distortions (Beaulieu-Laroche & Harnett, 2018; Major et al., 1994;  
464 Schaefer, Helmstaedter, Sakmann, & Korngreen, 2003; Silver, Traynelis, & Cull-Candy, 1992; Spruston, Jaffe,  
465 Williams, & Johnston, 1993). However, these simulations have not included the complete recording instruments,  
466 which are known to impose significant distortions on the recorded signals, especially when the biological source  
467 is physically small, such as small axons. Other efforts corrected distortions of measured voltage signals by  
468 estimating the transfer functions of the specific recording instrument (Brette et al., 2008; Jayant et al., 2017;  
469 Magistretti, Mantegazza, de Curtis, & Wanke, 1998). Although such formulations are computationally efficient,  
470 they could not be applied to the variable individual contribution of circuit components (e.g. pipettes,  $C_{\text{pip}}$  and  
471  $R_{\text{access}}$  compensatory elements), which imposes different signal distortions, such as filtering or instrumental  
472 capacitive load. Here, we implemented the pipette and all amplifier elements as individual circuits as they were  
473 actually built in the complete system and showed that the idealized instrument is sufficient to replicate the  
474 behavior of the complete measuring instrument and its compensatory capabilities (**Figures 1, 2 and 3**). Thus, we  
475 assume that implementing these components will allow adapting the model to other amplifier types. One of the  
476 unexpected findings of our study is the uneven capacitance distribution of recording pipettes (Benndorf, 1995).  
477 Majority of the total  $C_{\text{pip}}$  originate from the first two and a half mm from the tip (**Figure 3**). The gradual increase  
478 of relative wall thickness from the tip explains the larger contribution of the tip. Although the relative wall  
479 thickness was found to be constant previously for borosilicate glass capillaries (Benndorf, 1995) we observed  
480 decreased relative wall thickness toward the tip that explains the larger capacitive contribution of the tip.

481 To outline a feasible application, we utilized the complete instrumental model to correct the shape of APs directly  
482 recorded from a small axon terminal of a hippocampal mossy fiber. The size of this bouton (largest diameter: 0.7  
483  $\mu\text{m}$ ) was in the range of typical cortical axon terminals and was much smaller than the famous large mossy fiber  
484 terminals. The complete instrumental model in combination with the realistic axonal morphology and biophysics  
485 faithfully replicated the measured voltage signals (**Figures 4, 5 and 6**), including the signal artefacts and distorted  
486 fast APs. The simulation resulted in ionic currents and conductances that matched with previous results obtained  
487 with direct MF recordings from large boutons (**Figure 4E and F**) (H. Alle et al., 2011; Henrik Alle et al., 2009;  
488 Geiger & Jonas, 2000). Consequently, the retrieved native axonal APs were brief events with large amplitude  
489 (**Figures 4, 5 and 6**) whose shape closely resembled to the spike waveforms reported for the large axon terminals  
490 of the same axon (Henrik Alle et al., 2009; Geiger & Jonas, 2000). The simple Hodgkin-Huxley type conductance  
491 models with six free parameters were sufficient to restore the experimentally recorded MF AP waveforms.  
492 Although APs in the distal MFs can be described with a similar standard Hodgkin-Huxley type gating (Engel &  
493 Jonas, 2005; Ohura & Kamiya, 2018), AP simulation in other neuron types or in other subcellular elements  
494 required more detailed kinetic schemes (Stefan Hallermann et al., 2012; Ritzau-Jost et al., 2014; Ritzau-Jost et  
495 al., 2021; Schmidt-Hieber & Bischofberger, 2010). Therefore, implementation of more elaborated conductance  
496 models and inclusion of additional conductances can further improve our simulations and adapt to multiple  
497 activity regimes, such as the plasticity of AP shapes during sustained activity (Geiger & Jonas, 2000).

498 The complex model allowed us to dissect the sources of errors that contaminate recordings from small biological  
499 structures. As previously described for small, electrotonically compact neurons (D'Angelo, De Filippi, Rossi, &  
500 Taglietti, 1995; Goodman, Hall, Avery, & Lockery, 1998; Rohrbough & Broadie, 2002), we found that even with  
501 careful capacitance neutralization, the capacitive load added by the recording instrument substantially altered the  
502 intrinsic electrical behavior of the axon (**Figures 4 and 5**). Using a simplified neuronal representation, we  
503 confirmed with that instrumental capacitance effectively attenuates the action potentials in small neuronal  
504 structures (**Figure 7**) emphasizing again that  $C_{\text{pip}}$  reduction can substantially improve the accuracy of the  
505 measured voltage signal (Dudel, Hallermann, & Heckmann, 2000; Levis & Rae, 1993; Ogden & Stanfield, 1994;



Ritzau-Jost et al., 2021; Sakmann & Neher, 1983). Interestingly, we have shown that increase in the  $R_{\text{access}}$  reduced the instrumental impact on the cellular electrogenesis (probably due to effective electrical isolation of the neuronal structure from the recording pipette) suggesting that high impedance recording can have also advantages when experimental subject is small. The high impedance recordings may reduce the complexity of *post hoc* AP reconstitution as in this case the predicted AP shape depends only on the pipette filtering (Jayant et al., 2017). One of the major findings of our study is that instrumental and cellular factors define the accuracy of CC experiments not in isolation from each other, but their interaction is equally important. This was the most apparent when we examined the cellular contribution of the overall measurement error along a reconstructed MF which forms varicosities with different diameter. Thus, the differently sized axon segments provides different local biophysical conditions (**Figure 8**). In this arrangement, which is characteristic to all axons at a various degree (i.e. the size of the terminals and axonal shaft varies), the observed inverse relationship between local capacitance and the measurement error highlight the importance of structural details on direct axonal recordings.

A more general consideration is that the target-size-dependent effects are not specific to the axonal recordings. Experiments that target small cellular structures, whose electrical parameters are comparable to the capacitance introduced by the measuring instrument, are potentially subject to the distortions quantified in our study. The target-dependent measurement errors are not specific to the action potential firing either. In fact, the typically high conductance densities in axons (Hu & Jonas, 2014; Ritzau-Jost et al., 2014) can partly compensate for the observer effect. Depending on the local biophysical environment, the recording instruments can induce substantial observer error in dendritic membrane potential as well.

## Methods

Experimental procedures were made in accordance with the ethical guidelines of the Institute of Experimental Medicine Protection of Research Subjects Committee (MÁB-7/2016, PE/EA/48-2/2020).

530 *Constraining the amplifier model*

531 *The model cell.* Electrical components of the customized model cell (test#3 circuit, modified type 1U, Molecular  
532 Devices) were connected through conductive metal slots taken from a circuit breadboard allowing the change of  
533 circuit components without the need for soldering that would introduce variable stray capacitance (Supplementary  
534 Figure 1). We used non-inductive, low-noise resistors: resistors either originally present in the 1U model cell,  
535 10M $\Omega$  and 500 M $\Omega$ , or Ohmite SLIM-MOX10203 series, 20-100M $\Omega$ . Stray capacitance of each elements of the  
536 test circuits (including the resistors and their slots) was characterized in VC mode by measuring the capacitive  
537 load associated with the introduction of the given circuit element. All capacitors were considered ideal, that is,  
538 without any resistive component.

539 *Boosting unit.* We implemented a simplified boosting unit (Sigworth, 1995) in which capacitors were fixed (100  
540 pF and 120 pF) while resistors were directly fitted to reproduce the capacitive current response in the test#1  
541 configuration. Late phase of the response profile (starting 24  $\mu$ s after the stimulus onset) has particular importance  
542 because artefacts in that temporal domain can contaminate measured biological signals, therefore, this part of the  
543 signal was heavily weighted (850x) during the adjustment of the boosting unit.

544 *VC capacitance compensation:* Both CPf and CPs circuits were designed as described previously (Sigworth,  
545 1995).

546 *Stray capacitance of the CC circuit.* To optimize the circuitry of CC model, we performed measurements with  
547 test#3 circuit, where pipette parameters (10M $\Omega$ , 2.8 pF) and the size of the cell-equivalent resistor (500 M $\Omega$ ) were  
548 fixed, only cellular capacitance varied from 0.75 pF to 46.7 pF. We applied short current stimuli (-50 to -200 pA,  
549 3 ms) to elicit voltage responses with the maximal attainable capacitance neutralization or without CPN. Traces  
550 recorded in the absence of CPN allowed us to characterize the total capacitive load of the CC circuitry. The model  
551 most accurately reproduced the real voltage responses when a 0.76 pF stray capacitance was added at the amplifier  
552 input node (C<sub>CC</sub> on Figure 1).

553 *Capacitance neutralization (CPN)*. We implemented CPN in two steps. First, we added an idealized positive  
554 feedback loop, where the compensation through the  $C_{inj}$  can be modulated with the gain of an operational  
555 amplifier. This simple circuit representation was sufficient to reproduce the neutralizing capability of the real  
556 amplifier, that is, equal CPN settings resulted in the same level of compensation in the model as in the real  
557 experiments. Next, we reproduced the characteristic CPN-related stimulus artefacts that are present in typical  
558 current clamp measurements. We placed a resistor ( $R_{CPN}$ ) and an inductor ( $L_{CPN}$ ) to the CPN path (Figure 1) and  
559 tuned their parameters by direct fitting of the model voltage responses to the experimental data (examples are  
560 shown on Figure 2D).

561 *Bridge balance compensation (BB)*. To recreate the BB circuit, we created a reference signal from the command  
562 equivalent to the voltage drop caused by 1 M $\Omega$  load resistance (Figure 1). Scaled version of that reference signal  
563 was then subtracted from the pipette voltage for the correction.

564 *Bessel filters*. We added filters to the amplifier model to match of our actual biological recordings. We added an  
565 active linear filter consisting of two cascaded Sallen-Key filter stages (Figure 1). Filter parameters were set  
566 according to an available filter design tool (<https://www.analog.com/designtools/en/filterwizard/>) to produce  
567 output with four pole low-pass Bessel filter characteristics. All recordings were made with bypassed filtering  
568 mode and we applied 100 kHz lowpass filter throughout the simulations.

#### 569 *Pipette parameter measurements*

570 We used typical borosilicate glass capillaries (BF150-75-10, Sutter Instruments, Novato, CA) to fabricate pipettes  
571 that are suitable for recordings from small axons. To implement these high impedance pipettes into the model we  
572 measured their actual parameters. First, we assessed the actual pipette capacitance as a function of the tip distance  
573 by dipping known part of the recording pipettes into the recording solution. Pipette position was measured by the  
574 x axis values of the motorized micromanipulator (SM5 controller with Mini unit, Luigs und Neumann, Ratingen,  
575 Germany). First, we recorded the total capacitance of the instrumentation in open circuit VC mode when the  
576 pipette was out of the solution. Then, we gently moved the pipette to a position where the tip intermittently

577 reached the surface of the fluid characterized by the appearance of short conductive periods in the recorded VC  
578 signal. Then, the pipette was pushed forward to the solution to reach a position where the conductive state became  
579 stable (typically  $<5 \mu\text{m}$  forward movement). Starting from this tip position point, we systematically increased the  
580 length of the dipped part and quantified the capacitance in VC by integrating the first  $50 \mu\text{s}$  of the transient  
581 response to a  $-20 \text{ mV}$  voltage step. Integrated area was divided by the voltage step amplitude to convert the electric  
582 charge to capacitance.

583 To measure distribution of resistance along the pipettes, we broke off a known length of the pipette and measured  
584 the resistance of the remaining part in VC mode. First, we moved the pipette tip to a defined position under the  
585 objective and recorded its resistance. After withdrawal of the pipette, we broke the tip by gently touching it with  
586 a piece of lens cleaning tissue. The newly formed pipette tip was then positioned back to the reference position  
587 on the image. We determined the length of the broken pipette parts by reading the difference of the positioning  
588 motor. Resistance was measured in VC mode using  $-2$  to  $-20 \text{ mV}$  steps. We repeated the breaking process for  
589 each pipettes several times (1x-8x, using 22 pipettes in total).

590 We visualized the outer/inner diameter ratio ( $R_{OI}$ ) of the recording pipettes using a grinding system that gradually  
591 cut them in half. This measurement allowed to avoid the optical distortions caused by the lens effect of the  
592 cylindrical glass. The recording pipettes (the first 8-12 mm from the tip) were embedded into epoxy resin on a  
593 microscope slide. Pipettes were longitudinally grinded with a coarse-grained aluminium-oxide abrasive disc (grit  
594 size=600) until we reached the surface of the pipettes. Then, the grinding was occasionally interrupted to check  
595 the surface and cross-section of the pipette under a transmitted light microscope (Leica DM2500 microscope, 5X-  
596 100X magnifications). As the plane of the pipette tip was approached, we switched to fine-grained abrasive discs  
597 (grit size=6000). The images obtained from different cross section levels were then used to measure the pipette  
598 diameters (Adobe Photoshop 5.0). The diameter data were included only from those focal planes for distinct  
599 segments of the pipette tips, where the outer diameter was the largest and the relative wall thickness was the  
600 smallest. We assumed infinite pipette wall resistivity in the model.

## 601 *Slice preparation and electrophysiology*

602 Hippocampal slice was prepared from a 29 days old Wistar rat as previously described (Brunner & Szabadics,  
603 2016). In brief, the animal was deeply anaesthetized with isoflurane. After decapitation, the 350  $\mu$ m thick slice  
604 was cut with Leica VT1200S vibratome in ice-cold cutting solution (85 mM NaCl, 75 mM sucrose, 2.5 mM KCl,  
605 25 mM glucose, 1.25 mM NaH<sub>2</sub>PO<sub>4</sub>, 4 mM MgCl<sub>2</sub>, 0.5 mM CaCl<sub>2</sub>, and 24 mM NaHCO<sub>3</sub>) in an orientation  
606 optimized to preserve the mossy fibre tract in the hippocampal CA3 area (Bischofberger, Engel, Li, Geiger, &  
607 Jonas, 2006). The slice was incubated at 32 °C for 60 minutes after sectioning, and was stored at room temperature  
608 until the experiment. The recording solution was composed of 126 mM NaCl, 2.5 mM KCl, 26 mM NaHCO<sub>3</sub>, 2  
609 mM CaCl<sub>2</sub>, 2 mM MgCl<sub>2</sub>, 1.25 mM NaH<sub>2</sub>PO<sub>4</sub>, and 10 mM glucose (equilibrated with 95% O<sub>2</sub> and 5% CO<sub>2</sub> gas  
610 mixture). The pipette was filled with an intracellular solution containing 90 mM K-gluconate, 43.5 mM KCl, 1.8  
611 mM NaCl, 1.7 mM MgCl<sub>2</sub>, 0.05 mM EGTA, 10 mM HEPES, 2 mM Mg-ATP, 0.4 mM Na<sub>2</sub>-GTP, 10 mM  
612 phosphocreatine, 8 mM biocytin and 20  $\mu$ M Alexa Fluor 594 hydrazide (pH=7.25). The recordings were  
613 performed at 35 °C. For patching, axon was visualized with an upright IR-DIC microscope (Eclipse FN-1; Nikon)  
614 equipped with high-numeric aperture objective (Nikon 1.1 NA, Apo LWD 25 W), oil condenser (Nikon D-CUO  
615 DIC Oil Condenser, 1.4 NA) and a sCMOS camera (Andor Zyla 5.5). After the recordings the Alexa Fluor 594-  
616 labelled structure was visualized in situ using a confocal system (Nikon Eclipse C1 Plus). Then, the slice was  
617 fixed for further morphological experiments (see below).

618 To record from the individual small MF terminal, we searched for visually identifiable axonal structures under  
619 the guidance of the DIC optics in the *stratum lucidum* of the CA3 area, whose size was smaller than those of the  
620 typical large mossy fiber boutons. The patch pipette was pulled from borosilicate glass capillary (inner diameter:  
621 0.75 mm, outer diameter: 1.5 mm, Sutter Inc.). After the seal formation, we manually carefully compensated the  
622  $C_{pip}$  in VC mode. Compensated capacitive responses to -20 mV step command were then recorded and the average  
623 of 164 sweeps served as target for tuning the  $C_{pip}$  in the model. After establishing the whole-cell configuration by  
624 applying sudden negative pressure, we switched to CC mode to record the passive and active membrane responses  
625 from the axon with different CPN compensation. All recordings were collected with a MultiClamp 700B amplifier

626 (Molecular Devices) without filtering (filter bypassed) and digitized with Digidata1440 A/D board (Molecular  
627 Devices) at 250 kHz sampling rate using the pClamp10 software package (Molecular Devices). At the end of the  
628 experiment, we collected preliminary morphological data by imaging the Alexa Fluor 594 signal with the confocal  
629 system. The obtained z stack image was then used to confirm the MF identity (evidenced by the presence of a  
630 large MF terminal along the recorded axon, Figure 4B) and for the documentation of the recording position.

### 631 *3D morphological reconstruction*

632 After the recording, slice was fixed overnight at 4°C in 0.1 mM phosphate buffer containing 2% PFA and 0.1%  
633 picric acid. The slice was then re-sectioned (to 60 µm) and the sections were incubated overnight with Alexa  
634 Fluor 594-conjugated streptavidin in 0.5% Triton X-100 and 2% normal horse serum to reveal the biocytin signal.  
635 To investigate the detailed morphology, the recorded axon was imaged with a confocal system (60X objective,  
636 Plan Apo VC, NA=1.45, Nikon C2, x-y pixel size:0.08-0.1 µm, z-step: 0.1-0.15 µm). High resolution  
637 reconstructions were done automatically by the Vaa3D software (Peng, Bria, Zhou, Iannello, & Long, 2014; Peng,  
638 Ruan, Long, Simpson, & Myers, 2010; Peng, Tang, et al., 2014).

### 639 *Implementation of the seal in the model*

640 The seal was represented as a single resistor ( $R_{\text{seal}}$ ) connected in parallel to the cell. To estimate the  $R_{\text{seal}}$  in the  
641 axonal recording, first we calculated the ratio ( $R_{\text{ratio}}$ ) between the cellular input resistance ( $R_{\text{cell}}$ ) and the  $R_{\text{seal}}$   
642 based on the voltage shift produced by the shunt conductance of seal (Perkins, 2006):

$$643 \quad V_{\text{measured}}/V_{\text{rest}} = R_{\text{ratio}}/(1 + R_{\text{ratio}})$$

644 where  $V_{\text{measured}}$  is the recorded voltage,  $V_{\text{rest}}$  is the native resting membrane potential.  $R_{\text{seal}}$  and  $R_{\text{cell}}$  were then  
645 calculated from the measured input resistance ( $R_{\text{in,measured}}$ ) and from the  $R_{\text{ratio}}$  using the equations:

$$646 \quad 1/R_{\text{cell}} = 1/R_{\text{in,measured}} - 1/R_{\text{seal}}$$

647 where:

$$648 \quad R_{\text{seal}} = \text{ratio} * R_{\text{cell}}$$

649 The apparent resting membrane potential of the recorded MF axon was -75.2 mV, close to the resting membrane  
650 potential previously reported for the somata and axons of granule cells (~ -80 mV (Brunner & Szabadics, 2016;  
651 Martinello, Giacalone, Migliore, Brown, & Shah, 2019; Ruiz, Campanac, Scott, Rusakov, & Kullmann, 2010;  
652 Schmidt-Hieber, Jonas, & Bischofberger, 2004; Staley, Otis, & Mody, 1992)). This moderate shift, caused by the  
653 leak through the seal, suggests orders of magnitude larger  $R_{\text{seal}}$  compared to the axonal input resistance. Indeed,  
654 we calculated 65.64 G $\Omega$   $R_{\text{seal}}$  and 3.94 G $\Omega$   $R_{\text{cell}}$  for the recording assuming -80 mV resting membrane potential.  
655 Accordingly, we applied 65.64 G $\Omega$   $R_{\text{seal}}$  in the AP reconstitution model (Figures 4, 5 and 6), while  $R_{\text{seal}}$  was set  
656 to 50 G $\Omega$  in all other simulations. To compensate for the seal-induced depolarizing voltage shift, baseline  
657 membrane potential in the model was adjusted by constant current injection to match those of the experimental  
658 data.

#### 659 *General simulation parameters*

660 Cellular membrane parameters were assumed to be spatially uniform, unless stated otherwise. Potassium and  
661 sodium equilibrium potentials were set to -77 mV and +70 mV, respectively and we assumed -80 mV reversal  
662 potential for the leak conductance in active models. Simulations ran with 4  $\mu$ s and 0.5  $\mu$ s temporal resolution, in  
663 CC mode and in VC mode, respectively.

#### 664 *Fitting procedures*

665 We fitted the model responses to the experimental data to minimize the sum of squared error between them using  
666 the Brent's PRAXIS optimization algorithm embedded in NEURON. For  $C_{\text{pip}}$  estimation, a 5 ms long trace was  
667 considered with 2.5 ms baseline before the stimulus. For passive parameter estimations, we weighted the voltage  
668 response evoked by short current stimulus (25.8 ms from the stimulus onset, 3X) in order to equalize the  
669 contribution of short- and long pulse responses to the total error. For AP reconstruction, fitting interval started  
670 with 2.6 ms long baseline period before the stimulus onset. The actual APs were weighted eight-fold, starting 0.5  
671 ms before the peak. The optimization ended 1.5 ms following the AP peak to avoid the contamination of the

parameter estimation with afterdepolarization related mechanisms not implicated in the model (Martinello et al., 2019; Ohura & Kamiya, 2018).

We used sodium and potassium conductance mechanisms with canonical Hodgkin-Huxley gating scheme, in which not only the density can be freely adjusted but also the kinetics and the voltage dependence of the two types of conductance. For this, we modified the built-in Hodgkin-Huxley mechanisms of NEURON by introducing rate-scaling factors (scNa and scK) to adjust the speed of model channel operation. The originally implemented temperature scaling was removed from the mechanisms. In addition, we used global voltage shifts (vsNa and vsK) to modulate the voltage dependence of the channels. Altogether, free parameters ( $g_{\max}\text{Na}$ ,  $g_{\max}\text{K}$ , scNa, scK, vsNa, vsK) were constrained to obtain an ideal model of the AP waveform measured in our various experimental settings. Because the  $R_{\text{access}}$  can change during the recordings, this parameter was set individually for each target trace. Optimization of the individual AP fits was initiated from four parameter sets that allows exploration substantial part of the parameter space (Supplementary Figure 3A). The parallelized codes for AP reconstitution were run on the Comet supercomputer through the Neuroscience Gateway portal (Sivagnanam et al., 2013). To assess the quality of individual fits, their mean squared error was normalized to the baseline variance of the actual target trace. Of the results of the four parallel optimizations, the solution where the normalized error was the smallest was accepted as the best fit. Fit was rejected when the normalized error was larger than 10. Fitting of 2 of the original 90 target APs did not resulted in solutions, which met this criterion. These APs were excluded from the analysis (both were obtained with 7.386 pF CPN).

### *Assessments of the reliability of optimizations*

*In silico* reconstruction of the complete experiment consisted of subsequent optimization steps (Supplementary Figure 2A). First, we used VC data to set actual pipette parameters (1). After adding the model instrumentation and the detailed morphology of the recorded structure to the model, we tuned the passive cellular parameters together with the  $R_{\text{access}}$  (2). Next, we equipped the model structure with active sodium and potassium



696 conductances and adjusted their properties to match model responses the experimentally recorded AP waveform

697 (3). Finally, having established the appropriate conductance sets, we obtained the native behavior of the axon (4).

698 The reliability of the fitting procedures were tested with artificial traces with Gaussian noise.

699 To assess the accuracy of  $C_{tot}$  estimation, we generated target traces by simulating on-cell VC experiments. The

700 model always recovered correct  $C_{tot}$  value (proportion of fitting estimations within 10% error to the correct value:

701 100 %, n=990 optimizations, Supplementary Figure 2A and B) irrespective to the  $C_{tot}$  (5.8-13.7 pF) and noise

702 level (SD=0-35.3 pA) of the targets, which confirms the high sensitivity of VC based  $C_{pip}$  estimation.

703 To test the reliability of cellular passive parameter and  $R_{access}$  prediction, we created a hypothetical axon with

704 biologically plausible diameter distribution (log-normal distribution with mean of 0.6  $\mu\text{m}$  and variance of 0.4

705  $\mu\text{m}^2$ ). We attached the model axon to the pipette and generated hypothetical CC measurements with long and

706 short current stimuli ( $C_m$  range: 0.5 - 1.5  $\mu\text{F}/\text{cm}^2$ ,  $R_m$  range: 10 - 100  $\text{k}\Omega/\text{cm}^2$ ,  $R_i$  range: 50 - 250  $\Omega*\text{cm}$ ,  $R_{access}$ : 50

707 - 400  $\text{M}\Omega$ , noise SD = 1.73 mV). We fitted these synthetic targets from a single initiation parameter set ( $C_m$ : 1

708  $\text{pF}/\text{cm}^2$ ,  $R_m$ : 50  $\text{k}\Omega/\text{cm}^2$ ,  $R_i$ : 150  $\Omega*\text{cm}$ ,  $R_{access}$ : 150  $\text{M}\Omega$ ). 75 % of optimizations resulted in acceptable results,

709 that is, the fit error was less than 10-times the baseline variance of its target. In those successfully fitted cases the

710 predicted parameters were close to their predefined values (proportion of fitting estimations within 10% error to

711 the correct value:  $C_m$ : 90.83 %,  $R_m$ : 97.66 %,  $R_i$ : 81.88 %,  $R_{access}$ : 82.3 % n= 469 optimizations, Supplementary

712 Figure 2C).

713 We also verified the reliability of the prediction of native AP shapes in independent simulations (Supplementary

714 Figure 2D and E). For this we generated diverse AP waveforms using independent, sophisticated sodium and

715 potassium conductance mechanisms (using 8-state kinetic schemes obtained from (Stefan Hallermann et al., 2012;

716 Schmidt-Hieber & Bischofberger, 2010) in a single compartment neuron ( $R_{access}$ =100  $\text{M}\Omega$ ,  $C_{pip}$ =6.74 pF, BB

717 compensation=100  $\text{M}\Omega$ , CPN compensation= 6.85 pF,  $R_{seal}$ =50  $\text{G}\Omega$ , noise SD: 0.45 mV). Our standard fitting

718 routine reliably retrieved the shapes of APs.

719 *Systematic errors in model predictions*

720 We also examined the potential impact of systematic error sources on model predictions. Such potential error can  
721 originate from inaccuracies of the morphological reconstruction. Post hoc anatomical processing can result in  
722 considerable tissue shrinkage. Additionally, diameter of thin axonal processes is close to the resolution limit of  
723 light microscopy. To evaluate the potential effects of inaccurate anatomical representation of the recorded axon,  
724 we artificially altered the reconstructed morphologies and tested how the recovered native APs were affected.  
725 The axonal diameters were either homogeneously increased by 160 nm or reduced by 180 nm (axons were not  
726 allowed to shrink below 100 nm). As expected, recovered passive parameters and active conductance densities  
727 scaled with the diameter to compensate for the altered morphological dimensions (Table 1). However, as the  
728 model re-adjusted the local electrical environment by scaling the membrane properties, the predicted intra-axonal  
729 and native AP waveforms remained remarkably similar in spite of the large changes in the morphology and  
730 passive membrane parameter.

731  $R_{seal}$  provides an additional error source because its calculation depends on the native resting membrane potential,  
732 which can not be assessed directly (i.e. measurements start in cell attached mode). Therefore, we defined the  
733 theoretical lower limit for the  $R_{seal}$  in the direct axonal recording; when native resting membrane potential equals  
734 with the potassium equilibrium potential (-93 mV with the solutions used in the experiment)  $R_{seal}$  would be only  
735 20.58 G $\Omega$ . Re-optimization of the model using this small  $R_{seal}$  caused only minor alterations in the predicted  
736 conductances and AP parameters (reduced  $R_{seal}$  model, Table 1). Altogether, these control simulations suggest  
737 that potential systematic errors have marginal impact on the primary results of the manuscript.

|                                                               | <b>standard model</b>                                        | <b>reduced <math>R_{seal}</math></b> | <b>thick morphology</b> | <b>thin morphology</b> |                    |
|---------------------------------------------------------------|--------------------------------------------------------------|--------------------------------------|-------------------------|------------------------|--------------------|
| <b>Passive parameters</b>                                     | <b><math>R_m</math>(k<math>\Omega</math>/cm<sup>2</sup>)</b> | 60.01                                | 72.92                   | 62.97                  | 38.88              |
|                                                               | <b><math>C_m</math>(<math>\mu</math>F/cm<sup>2</sup>)</b>    | 0.65                                 | 0.62                    | 0.62                   | 0.99               |
|                                                               | <b><math>R_i</math>(<math>\Omega</math>*cm)</b>              | 147.3                                | 141.54                  | 208.08                 | 56.78              |
|                                                               | <b>normalized error</b>                                      | 2.96                                 | 3.05                    | 2.95                   | 3.18               |
| <b>active conductances for APs recorded with CPN=6.5 pF</b>   | <b><math>g_{Na}</math>(mS/cm<sup>2</sup>)</b>                | 159.02 $\pm$ 1.73                    | 160.24 $\pm$ 2.1        | 150.24 $\pm$ 1.86      | 229.79 $\pm$ 3.57  |
|                                                               | <b><math>g_K</math>(mS/cm<sup>2</sup>)</b>                   | 5.83 $\pm$ 0.46                      | 5.46 $\pm$ 0.04         | 5.33 $\pm$ 0.04        | 12.74 $\pm$ 0.56   |
|                                                               | <b>normalized error</b>                                      | 5.2 $\pm$ 0.16                       | 5.09 $\pm$ 0.16         | 5.22 $\pm$ 0.16        | 5.72 $\pm$ 0.19    |
| <b>active conductances for APs recorded with CPN=7 pF</b>     | <b><math>g_{Na}</math>(mS/cm<sup>2</sup>)</b>                | 151.7 $\pm$ 0.95                     | 150.29 $\pm$ 1.06       | 142.27 $\pm$ 0.97      | 232.6 $\pm$ 1.5    |
|                                                               | <b><math>g_K</math>(mS/cm<sup>2</sup>)</b>                   | 5.41 $\pm$ 0.03                      | 5.08 $\pm$ 0.03         | 5.08 $\pm$ 0.03        | 9.23 $\pm$ 0.08    |
|                                                               | <b>normalized error</b>                                      | 5.89 $\pm$ 0.17                      | 5.92 $\pm$ 0.17         | 6.36 $\pm$ 0.18        | 6.04 $\pm$ 0.19    |
| <b>active conductances for APs recorded with CPN=7.386 pF</b> | <b><math>g_{Na}</math>(mS/cm<sup>2</sup>)</b>                | 160.03 $\pm$ 1.47                    | 142.26 $\pm$ 1.17       | 144.38 $\pm$ 1.23      | 249.13 $\pm$ 2.44  |
|                                                               | <b><math>g_K</math>(mS/cm<sup>2</sup>)</b>                   | 6.32 $\pm$ 0.09                      | 6.08 $\pm$ 0.44         | 5.87 $\pm$ 0.07        | 11.24 $\pm$ 0.146  |
|                                                               | <b>normalized error</b>                                      | 6.8 $\pm$ 0.28                       | 8.22 $\pm$ 0.34         | 8.1 $\pm$ 0.3          | 7.35 $\pm$ 0.3     |
| n=30 AP reconstitution                                        |                                                              |                                      |                         |                        |                    |
| <b>AP parameters (reconstructed measurement)</b>              | <b><math>dV/dt_{max}</math>(mV/ms)</b>                       | 363.26 $\pm$ 0.93                    | 369.87 $\pm$ 6.04       | 354.99 $\pm$ 0.8       | 372.7 $\pm$ 0.96   |
|                                                               | <b>peak(mV)</b>                                              | 9.01 $\pm$ 0.12                      | 9.01 $\pm$ 0.49         | 8.98 $\pm$ 0.12        | 9.24 $\pm$ 0.12    |
|                                                               | <b>threshold(mV)</b>                                         | -45.28 $\pm$ 0.07                    | -45.29 $\pm$ 0.06       | -45.17 $\pm$ 0.07      | -45.69 $\pm$ 0.06  |
|                                                               | <b>half-width(ms)</b>                                        | 0.52 $\pm$ 0.002                     | 0.52 $\pm$ 0.004        | 0.51 $\pm$ 0.002       | 0.52 $\pm$ 0.002   |
| <b>AP parameters (local in the axon)</b>                      | <b><math>dV/dt_{max}</math>(mV/ms)</b>                       | 453.11 $\pm$ 2.54                    | 453.82 $\pm$ 2.53       | 450.44 $\pm$ 2.34      | 481.59 $\pm$ 3.06  |
|                                                               | <b>peak(mV)</b>                                              | 21.96 $\pm$ 0.12                     | 21.23 $\pm$ 0.12        | 22.13 $\pm$ 0.12       | 22.34 $\pm$ 0.11   |
|                                                               | <b>threshold(mV)</b>                                         | -35.88 $\pm$ 0.09                    | -35.92 $\pm$ 0.09       | -36.01 $\pm$ 0.09      | -36.97 $\pm$ 0.09  |
|                                                               | <b>half-width(ms)</b>                                        | 0.48 $\pm$ 0.002                     | 0.49 $\pm$ 0.002        | 0.48 $\pm$ 0.002       | 0.49 $\pm$ 0.002   |
| <b>AP parameters (native, I-step evoked)</b>                  | <b><math>dV/dt_{max}</math>(mV/ms)</b>                       | 1064.81 $\pm$ 5.1                    | 1111.03 $\pm$ 5.76      | 865.03 $\pm$ 4.65      | 914.95 $\pm$ 6.32  |
|                                                               | <b>peak(mV)</b>                                              | 46.85 $\pm$ 0.09                     | 47.34 $\pm$ 0.09        | 40.06 $\pm$ 0.12       | 40.26 $\pm$ 0.15   |
|                                                               | <b>threshold(mV)</b>                                         | -37.36 $\pm$ 0.09                    | -37.64 $\pm$ 0.09       | -35.93 $\pm$ 0.09      | -36.7 $\pm$ 0.09   |
|                                                               | <b>half-width(ms)</b>                                        | 0.33 $\pm$ 0.002                     | 0.33 $\pm$ 0.002        | 0.33 $\pm$ 0.002       | 0.34 $\pm$ 0.002   |
| <b>AP parameters (native, propagating)</b>                    | <b><math>dV/dt_{max}</math>(mV/ms)</b>                       | 1605.96 $\pm$ 9.75                   | 1671.34 $\pm$ 10.82     | 1609.7 $\pm$ 10.18     | 1549.38 $\pm$ 12.2 |
|                                                               | <b>peak(mV)</b>                                              | 64.21 $\pm$ 0.07                     | 64.71 $\pm$ 0.07        | 64.16 $\pm$ 0.08       | 63.29 $\pm$ 0.11   |
|                                                               | <b>AP width @-10 mV (ms)</b>                                 | 0.36 $\pm$ 0.002                     | 0.35 $\pm$ 0.002        | 0.36 $\pm$ 0.002       | 0.36 $\pm$ 0.002   |
|                                                               | <b>propagation velocity(ms)</b>                              | 0.45 $\pm$ 0.001                     | 0.48 $\pm$ 0.002        | 0.46 $\pm$ 0.002       | 0.43 $\pm$ 0.002   |

**Table 1. Summary of parameters obtained from different model configurations**

*Simulations to explore the correlations between signal distortions and recording conditions (Figure 7)*

We used a single compartment with fixed 10  $\mu$ m<sup>2</sup> surface area to represent neuronal structure in these simulations.

Electrical behavior of small and larger cells was set by scaling the active and passive biophysical parameters of

the compartment (for small cell:  $C_m=10 \mu$ F/cm<sup>2</sup>,  $R_m=2$  k $\Omega$ /cm<sup>2</sup>,  $g_{Na}$  density=1.5 S/cm<sup>2</sup>,  $g_K$  density=0.4 S/cm<sup>2</sup>; for

745 larger cell:  $C_m=100 \mu\text{F}/\text{cm}^2$ ,  $R_m=0.2 \text{ k}\Omega/\text{cm}^2$ ,  $g_{\text{Na}}$  density= $15 \text{ S}/\text{cm}^2$ ,  $g_{\text{K}}$  density= $4 \text{ S}/\text{cm}^2$ ). To keep  $R_{\text{seal}}/R_{\text{cell}}$  ratio  
746 constant between the two conditions,  $R_{\text{seal}}$  was set to  $50 \text{ G}\Omega$  and  $5 \text{ G}\Omega$ , for small and larger cell, respectively.  
747 The pipette capacitance was fixed to  $6.74 \text{ pF}$  while  $R_{\text{access}}$  was systematically varied in the range of  $1\text{-}200 \text{ M}\Omega$ .  
748 To mimic optimal recording configuration, the applied CPN settings ( $6.8 \text{ pF}$ ) closely matched with  $C_{\text{pip}}$ . APs were  
749 elicited with  $3 \text{ ms}$  long current stimuli ( $30 \text{ pA}$  and  $160 \text{ pA}$  for small and larger cell, respectively).

### 750 *Simulations to explore the correlations between signal distortions and axonal morphology (Figure 8)*

751 The detailed morphology of a somatically labeled granule cell was imported to the NEURON. Dendritic spines  
752 were implemented by scaling two-fold the  $C_m$  and the leak conductance in dendrites. Passive parameters ( $R_i:150$   
753  $\Omega*\text{cm}$ ,  $C_m:1 \mu\text{F}/\text{cm}^2$ ,  $R_m:50 \text{ k}\Omega/\text{cm}^2$ ) were constant otherwise. Active conductances ( $g_{\text{Na}}$  density= $300 \text{ mS}/\text{cm}^2$ ,  
754  $g_{\text{K}}$  density= $15 \text{ mS}/\text{cm}^2$ ) were homogeneously distributed along the cell, except the initial part of the axon where  
755 we applied higher channel densities ( $g_{\text{Na}}$  density= $1200 \text{ mS}/\text{cm}^2$ ,  $g_{\text{K}}$  density= $75 \text{ mS}/\text{cm}^2$ ) with left-shifted  
756 activation and inactivation ( $10 \text{ mV}$  in the hyperpolarized direction). To explore the distortions in axonal AP  
757 recordings, position of recording electrode ( $C_{\text{tot}}=6.74 \text{ pF}$ ,  $R_{\text{access}}=60 \text{ M}\Omega$ ,  $R_{\text{seal}}=50 \text{ G}\Omega$ , applied CPN= $6.8 \text{ pF}$ ) was  
758 systematically changed along the main axon ( $n=942$  recording positions). APs were evoked by  $3 \text{ ms}$  long current  
759 stimuli at each recording position. Amplitude of the injected current was automatically adjusted to evoke APs  
760  $\sim 1.5 \text{ ms}$  ( $1.33 \pm 0.01 \text{ ms}$  delay,  $n=942$  APs) after stimulus onset. Local capacitance was determined for each  
761 recording position using idealized VC simulations in the absence of experimental instrumentation (built-in  
762 SEClamp mechanism with  $10 \text{ M}\Omega$  series resistance). For quantification, we integrated the first  $100 \mu\text{s}$  of the  
763 transient capacitive response to  $-20 \text{ mV}$  voltage step. The resulted charge was divided by the voltage step  
764 amplitude.

### 765 *Data analysis and statistics*

766 AP threshold was determined as membrane voltage where depolarization rate exceeded  $20 \text{ mV}/\text{ms}$ . AP amplitude  
767 was calculated as the voltage difference between the absolute peak potential and the threshold. AP half-width was

768 defined as the spike duration at half of its amplitude. AP conduction velocity was determined by measuring the  
769 temporal difference between AP peaks at the initiation and at the recording site.

770 Data were analyzed using pClamp (Molecular Devices), OriginPro (OriginLab) and Excel (Microsoft) Photoshop  
771 (Adobe) and custom written NEURON or Python scripts. The relevant NEURON codes are available on GitHub  
772 (<https://github.com/brunnerjanos/amplifier-model>). Voltage values are presented without correction for the liquid  
773 junction potential. Normality of the data was assessed with Shapiro-Wilks test. Population data are presented as  
774 mean  $\pm$  s.e.m.

## 776 Acknowledgements

777 This work was carried out with the full support of János Szabadics' laboratory. We are grateful to János Szabadics  
778 for his continuous support, advices on the project and constructive comments on the manuscript. This work was  
779 funded by ERC-CoG 772452 (nanoAXON) grant to János Szabadics and the János Bolyai Research Fellowship  
780 of the Hungarian Academy of Sciences (to JB). We are thankful for the computational resources provided by the  
781 Neuroscience Gateway. We thank László Barna, the Nikon Microscopy Center at the Institute of Experimental  
782 Medicine, Nikon Europe B.V., Nikon Austria GmbH, and Auro-Science Consulting Ltd, for kindly providing  
783 microscopy support and Dóra Kókay and Andrea Szabó for technical assistance.

## 785 References

- 786 Acsady, L., Kamondi, A., Sik, A., Freund, T., & Buzsáki, G. (1998). GABAergic cells are the major postsynaptic targets of  
787 mossy fibers in the rat hippocampus. *Journal of Neuroscience*, *18*(9), 3386-3403.
- 788 Alle, H., Kubota, H., & Geiger, J. R. (2011). Sparse but highly efficient Kv3 outpace BKCa channels in action potential  
789 repolarization at hippocampal mossy fiber boutons. *J Neurosci*, *31*(22), 8001-8012. doi:10.1523/jneurosci.0972-  
790 11.2011
- 791 Alle, H., Roth, A., & Geiger, J. R. (2009). Energy-efficient action potentials in hippocampal mossy fibers. *Science*, *325*(5946),  
792 1405-1408.
- 793 Araki, T., & Otani, T. (1955). Response of single motoneurons to direct stimulation in toad's spinal cord. *J Neurophysiol*,  
794 *18*(5), 472-485. doi:10.1152/jn.1955.18.5.472

- 795 Barbour, B. (2014). Electronics for electrophysiologists. Retrieved from  
796 [https://www.biologie.ens.fr/~barbour/electronics\\_for\\_electrophysiologists.pdf](https://www.biologie.ens.fr/~barbour/electronics_for_electrophysiologists.pdf)
- 797 Bean, B. P. (2007). The action potential in mammalian central neurons. *Nature Reviews Neuroscience*, 8, 451.  
798 doi:10.1038/nrn2148
- 799 Beaulieu-Laroche, L., & Harnett, M. T. (2018). Dendritic Spines Prevent Synaptic Voltage Clamp. *Neuron*, 97(1), 75-82.e73.  
800 doi:10.1016/j.neuron.2017.11.016
- 801 Benndorf, K. (1995). Low-noise recording. In *Single-Channel Recording* (pp. 129-145): Springer.
- 802 Bischofberger, J., Engel, D., Li, L., Geiger, J. R., & Jonas, P. (2006). Patch-clamp recording from mossy fiber terminals in  
803 hippocampal slices. *Nature protocols*, 1(4), 2075.
- 804 Borst, J. G., & Sakmann, B. (1999). Effect of changes in action potential shape on calcium currents and transmitter release  
805 in a calyx-type synapse of the rat auditory brainstem. *Philos Trans R Soc Lond B Biol Sci*, 354(1381), 347-355.  
806 doi:10.1098/rstb.1999.0386
- 807 Branco, T., & Häusser, M. (2011). Synaptic Integration Gradients in Single Cortical Pyramidal Cell Dendrites. *Neuron*, 69(5),  
808 885-892. doi:10.1016/j.neuron.2011.02.006
- 809 Brette, R., Piwkowska, Z., Monier, C., Rudolph-Lilith, M., Fournier, J., Levy, M., . . . Destexhe, A. (2008). High-resolution  
810 intracellular recordings using a real-time computational model of the electrode. *Neuron*, 59(3), 379-391.
- 811 Brunner, J., & Szabadics, J. (2016). Analogue modulation of back-propagating action potentials enables dendritic hybrid  
812 signalling. *Nature Communications*, 7, 13033.
- 813 Chao, O. Y., & Yang, Y.-M. (2019). Timing constraints of action potential evoked Ca<sup>2+</sup> current and transmitter release at a  
814 central nerve terminal. *Scientific Reports*, 9(1), 4448. doi:10.1038/s41598-019-41120-5
- 815 Cornwall, M. C., & Thomas, M. V. (1981). Glass microelectrode tip capacitance: its measurement and a method for its  
816 reduction. *J Neurosci Methods*, 3(3), 225-232. doi:10.1016/0165-0270(81)90057-1
- 817 D'Angelo, E., De Filippi, G., Rossi, P., & Taglietti, V. (1995). Synaptic excitation of individual rat cerebellar granule cells in  
818 situ: evidence for the role of NMDA receptors. *J Physiol*, 484 ( Pt 2), 397-413. doi:10.1113/jphysiol.1995.sp020673
- 819 Dudel, J., Hallermann, S., & Heckmann, M. (2000). Quartz glass pipette puller operating with a regulated oxy-hydrogen  
820 burner. *Pflügers Archiv*, 441(2-3), 175-180.
- 821 Engel, D., & Jonas, P. (2005). Presynaptic action potential amplification by voltage-gated Na<sup>+</sup> channels in hippocampal  
822 mossy fiber boutons. *Neuron*, 45(3), 405-417. doi:10.1016/j.neuron.2004.12.048
- 823 Geiger, J. R., & Jonas, P. (2000). Dynamic control of presynaptic Ca<sup>2+</sup> inflow by fast-inactivating K<sup>+</sup> channels in  
824 hippocampal mossy fiber boutons. *Neuron*, 28(3), 927-939.
- 825 Goldstein, S. S., & Rall, W. (1974). Changes of action potential shape and velocity for changing core conductor geometry.  
826 *Biophysical journal*, 14(10), 731-757.
- 827 Goodman, M. B., Hall, D. H., Avery, L., & Lockery, S. R. (1998). Active Currents Regulate Sensitivity and Dynamic Range in  
828 *C. elegans* Neurons. *Neuron*, 20(4), 763-772. doi:10.1016/S0896-6273(00)81014-4
- 829 Hallermann, S., De Kock, C. P., Stuart, G. J., & Kole, M. H. (2012). State and location dependence of action potential  
830 metabolic cost in cortical pyramidal neurons. *Nature neuroscience*, 15(7), 1007.
- 831 Hallermann, S., Pawlu, C., Jonas, P., & Heckmann, M. (2003). A large pool of releasable vesicles in a cortical glutamatergic  
832 synapse. *Proc Natl Acad Sci U S A*, 100(15), 8975-8980. doi:10.1073/pnas.1432836100
- 833 Hamill, O. P., Marty, A., Neher, E., Sakmann, B., & Sigworth, F. J. (1981). Improved patch-clamp techniques for high-  
834 resolution current recording from cells and cell-free membrane patches. *Pflügers Archiv*, 391(2), 85-100.  
835 doi:10.1007/BF00656997
- 836 Hines, M. L., & Carnevale, N. T. (1997). The NEURON simulation environment. *Neural computation*, 9(6), 1179-1209.
- 837 Hodgkin, A. L., & Huxley, A. F. (1952). A quantitative description of membrane current and its application to conduction  
838 and excitation in nerve. *The Journal of physiology*, 117(4), 500-544. doi:10.1113/jphysiol.1952.sp004764
- 839 Hu, H., & Jonas, P. (2014). A supercritical density of Na<sup>(+)</sup> channels ensures fast signaling in GABAergic interneuron axons.  
840 *Nat Neurosci*, 17(5), 686-693. doi:10.1038/nn.3678
- 841 Jayant, K., Hirtz, J. J., Jen-La Plante, I., Tsai, D. M., De Boer, W. D., Semonche, A., . . . Shepard, K. L. (2017). Targeted  
842 intracellular voltage recordings from dendritic spines using quantum-dot-coated nanopipettes. *Nature  
843 nanotechnology*, 12(4), 335.
- 844 Katz, B., & Miledi, R. (1967). A study of synaptic transmission in the absence of nerve impulses. *J Physiol*, 192(2), 407-436.  
845 doi:10.1113/jphysiol.1967.sp008307

- 846 Kawaguchi, S.-y., & Sakaba, T. (2015). Control of inhibitory synaptic outputs by low excitability of axon terminals revealed  
847 by direct recording. *Neuron*, 85(6), 1273-1288.
- 848 Kress, G. J., Dowling, M. J., Meeks, J. P., & Mennerick, S. (2008). High threshold, proximal initiation, and slow conduction  
849 velocity of action potentials in dentate granule neuron mossy fibers. *J Neurophysiol*, 100(1), 281-291.  
850 doi:10.1152/jn.90295.2008
- 851 Kwon, T., Sakamoto, M., Peterka, D. S., & Yuste, R. (2017). Attenuation of Synaptic Potentials in Dendritic Spines. *Cell Rep*,  
852 20(5), 1100-1110. doi:10.1016/j.celrep.2017.07.012
- 853 Levis, R. A., & Rae, J. L. (1993). The use of quartz patch pipettes for low noise single channel recording. *Biophysical journal*,  
854 65(4), 1666-1677.
- 855 Magistretti, J., Mantegazza, M., de Curtis, M., & Wanke, E. (1998). Modalities of distortion of physiological voltage signals  
856 by patch-clamp amplifiers: a modeling study. *Biophysical journal*, 74(2 Pt 1), 831-842. doi:10.1016/S0006-  
857 3495(98)74007-X
- 858 Major, G., Larkman, A. U., Jonas, P., Sakmann, B., & Jack, J. J. (1994). Detailed passive cable models of whole-cell recorded  
859 CA3 pyramidal neurons in rat hippocampal slices. *J Neurosci*, 14(8), 4613-4638.
- 860 Manor, Y., Koch, C., & Segev, I. (1991). Effect of geometrical irregularities on propagation delay in axonal trees. *Biophysical*  
861 *journal*, 60(6), 1424-1437.
- 862 Martinello, K., Giacalone, E., Migliore, M., Brown, D. A., & Shah, M. M. (2019). The subthreshold-active KV 7 current  
863 regulates neurotransmission by limiting spike-induced Ca<sup>2+</sup> influx in hippocampal mossy fiber synaptic terminals.  
864 *Communications biology*, 2(1), 145.
- 865 Marty, A., & Neher, E. (1995). Tight-Seal Whole-Cell Recording. In B. Sakmann & E. Neher (Eds.), *Single-Channel Recording*  
866 (pp. 31-52). Boston, MA: Springer US.
- 867 Nörenberg, A., Hu, H., Vida, I., Bartos, M., & Jonas, P. (2010). Distinct nonuniform cable properties optimize rapid and  
868 efficient activation of fast-spiking GABAergic interneurons. *Proceedings of the National Academy of Sciences*,  
869 107(2), 894-899.
- 870 Novak, P., Gorelik, J., Vivekananda, U., Shevchuk, A. I., Ermolyuk, Y. S., Bailey, R. J., . . . Klenerman, D. (2013). Nanoscale-  
871 targeted patch-clamp recordings of functional presynaptic ion channels. *Neuron*, 79(6), 1067-1077.
- 872 Ogden, D., & Stanfield, P. (1994). *Patch clamp techniques for single channel and whole-cell recording*. Paper presented at  
873 the Microelectrode techniques: the Plymouth workshop handbook.
- 874 Ohura, S., & Kamiya, H. (2018). Sodium Channel-Dependent and -Independent Mechanisms Underlying Axonal  
875 Afterdepolarization at Mouse Hippocampal Mossy Fibers. *eneuro*, 5(4), ENEURO.0254-0218.2018.  
876 doi:10.1523/eneuro.0254-18.2018
- 877 Peng, H., Bria, A., Zhou, Z., Iannello, G., & Long, F. (2014). Extensible visualization and analysis for multidimensional images  
878 using Vaa3D. *Nature protocols*, 9(1), 193.
- 879 Peng, H., Ruan, Z., Long, F., Simpson, J. H., & Myers, E. W. (2010). V3D enables real-time 3D visualization and quantitative  
880 analysis of large-scale biological image data sets. *Nature biotechnology*, 28(4), 348.
- 881 Peng, H., Tang, J., Xiao, H., Bria, A., Zhou, J., Butler, V., . . . Chen, J. (2014). Virtual finger boosts three-dimensional imaging  
882 and microsurgery as well as terabyte volume image visualization and analysis. *Nature Communications*, 5, 4342.
- 883 Perkins, K. L. (2006). Cell-attached voltage-clamp and current-clamp recording and stimulation techniques in brain slices.  
884 *Journal of neuroscience methods*, 154(1-2), 1-18. doi:10.1016/j.jneumeth.2006.02.010
- 885 Ritzau-Jost, A., Delvendahl, I., Rings, A., Byczkiewicz, N., Harada, H., Shigemoto, R., . . . Hallermann, S. (2014). Ultrafast  
886 Action Potentials Mediate Kilohertz Signaling at a Central Synapse. *Neuron*, 84(1), 152-163.  
887 doi:10.1016/j.neuron.2014.08.036
- 888 Ritzau-Jost, A., Tsintsadze, T., Krueger, M., Ader, J., Bechmann, I., Eilers, J., . . . Hallermann, S. (2021). Large, Stable Spikes  
889 Exhibit Differential Broadening in Excitatory and Inhibitory Neocortical Boutons. *Cell Reports*, 34(2).  
890 doi:10.1016/j.celrep.2020.108612
- 891 Rohrbough, J., & Broadie, K. (2002). Electrophysiological analysis of synaptic transmission in central neurons of *Drosophila*  
892 larvae. *Journal of neurophysiology*, 88(2), 847-860.
- 893 Rollenhagen, A., Sätzler, K., Rodríguez, E. P., Jonas, P., Frotscher, M., & Lübke, J. H. (2007). Structural determinants of  
894 transmission at large hippocampal mossy fiber synapses. *Journal of Neuroscience*, 27(39), 10434-10444.
- 895 Roth, A., & Häusser, M. (2001). Compartmental models of rat cerebellar Purkinje cells based on simultaneous somatic and  
896 dendritic patch-clamp recordings. *The Journal of physiology*, 535(2), 445-472.

- 897 Rowan, M. J., DelCanto, G., Jianqing, J. Y., Kamasawa, N., & Christie, J. M. (2016). Synapse-level determination of action  
898 potential duration by K<sup>+</sup> channel clustering in axons. *Neuron*, *91*(2), 370-383.
- 899 Ruiz, A., Campanac, E., Scott, R. S., Rusakov, D. A., & Kullmann, D. M. (2010). Presynaptic GABA A receptors enhance  
900 transmission and LTP induction at hippocampal mossy fiber synapses. *Nature neuroscience*, *13*(4), 431.
- 901 Sakmann, B., & Neher, E. (1983). Geometric parameters of pipettes and membrane patches. In *Single-channel recording*  
902 (pp. 37-51): Springer.
- 903 Schaefer, A. T., Helmstaedter, M., Sakmann, B., & Korngreen, A. (2003). Correction of Conductance Measurements in Non-  
904 Space-Clamped Structures: 1. Voltage-Gated K<sup>+</sup> Channels. *Biophysical journal*, *84*(6), 3508-3528.  
905 doi:10.1016/S0006-3495(03)75086-3
- 906 Schmidt-Hieber, C., & Bischofberger, J. (2010). Fast sodium channel gating supports localized and efficient axonal action  
907 potential initiation. *Journal of Neuroscience*, *30*(30), 10233-10242.
- 908 Schmidt-Hieber, C., Jonas, P., & Bischofberger, J. (2004). Enhanced synaptic plasticity in newly generated granule cells of  
909 the adult hippocampus. *Nature*, *429*(6988), 184.
- 910 Schmidt-Hieber, C., Jonas, P., & Bischofberger, J. (2007). Subthreshold dendritic signal processing and coincidence  
911 detection in dentate gyrus granule cells. *Journal of Neuroscience*, *27*(31), 8430-8441.
- 912 Sherman-Gold, R. (2012). *The Axon Guide, A Guide to Electrophysiology & Biophysics Laboratory Techniques* (3rd ed.):  
913 Molecular Devices, LLC.
- 914 Sigworth, F. (1995). Electronic design of the patch clamp. In *Single-channel recording* (pp. 95-127): Springer.
- 915 Silver, R. A., Traynelis, S. F., & Cull-Candy, S. G. (1992). Rapid-time-course miniature and evoked excitatory currents at  
916 cerebellar synapses in situ. *Nature*, *355*(6356), 163-166.
- 917 Sivagnanam, S., Majumdar, A., Yoshimoto, K., Astakhov, V., Bandrowski, A., Martone, M. E., & Carnevale, N. T. (2013).  
918 *Introducing the Neuroscience Gateway*. Paper presented at the IWSG.
- 919 Spruston, N., Jaffe, D. B., Williams, S. H., & Johnston, D. (1993). Voltage- and space-clamp errors associated with the  
920 measurement of electrotonically remote synaptic events. *Journal of neurophysiology*, *70*(2), 781-802.  
921 doi:10.1152/jn.1993.70.2.781
- 922 Staley, K. J., Otis, T. S., & Mody, I. (1992). Membrane properties of dentate gyrus granule cells: comparison of sharp  
923 microelectrode and whole-cell recordings. *Journal of neurophysiology*, *67*(5), 1346-1358.
- 924 Strickholm, A. (1995). A single electrode voltage, current- and patch-clamp amplifier with complete stable series resistance  
925 compensation. *Journal of neuroscience methods*, *61*(1), 53-66. doi:10.1016/0165-0270(95)00021-L
- 926 Szoboszlai, M., Lőrincz, A., Lanore, F., Vervaeke, K., Silver, R. A., & Nusser, Z. (2016). Functional properties of dendritic gap  
927 junctions in cerebellar Golgi cells. *Neuron*, *90*(5), 1043-1056.
- 928 Vivekananda, U., Novak, P., Bello, O. D., Korchev, Y. E., Krishnakumar, S. S., Volynski, K. E., & Kullmann, D. M. (2017). Kv1.  
929 1 channelopathy abolishes presynaptic spike width modulation by subthreshold somatic depolarization.  
930 *Proceedings of the National Academy of Sciences*, *114*(9), 2395-2400.
- 931 Wilson, C. J., & Park, M. R. (1989). Capacitance compensation and bridge balance adjustment in intracellular recording  
932 from dendritic neurons. *Journal of neuroscience methods*, *27*(1), 51-75. doi:10.1016/0165-0270(89)90052-6
- 933 Ying, L., Bruckbauer, A., Rothery, A. M., Korchev, Y. E., & Klenerman, D. (2002). Programmable Delivery of DNA through a  
934 Nanopipet. *Analytical Chemistry*, *74*(6), 1380-1385. doi:10.1021/ac015674m
- 935 Zbili, M., & Debanne, D. (2019). Past and Future of Analog-Digital Modulation of Synaptic Transmission. *Frontiers in Cellular*  
936 *Neuroscience*, *13*(160). doi:10.3389/fncel.2019.00160

937



938

## Supplementary Figure 1

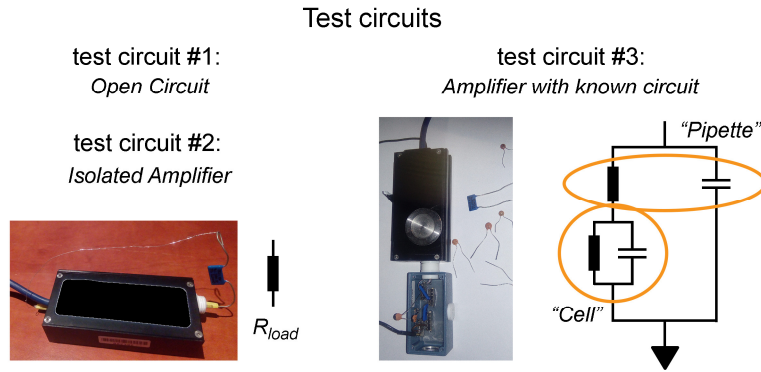

939

940

Supporting data for Figures 1 and 2. Test circuits used for the characterization of the circuit components

941

942

## Supplementary Figure 2

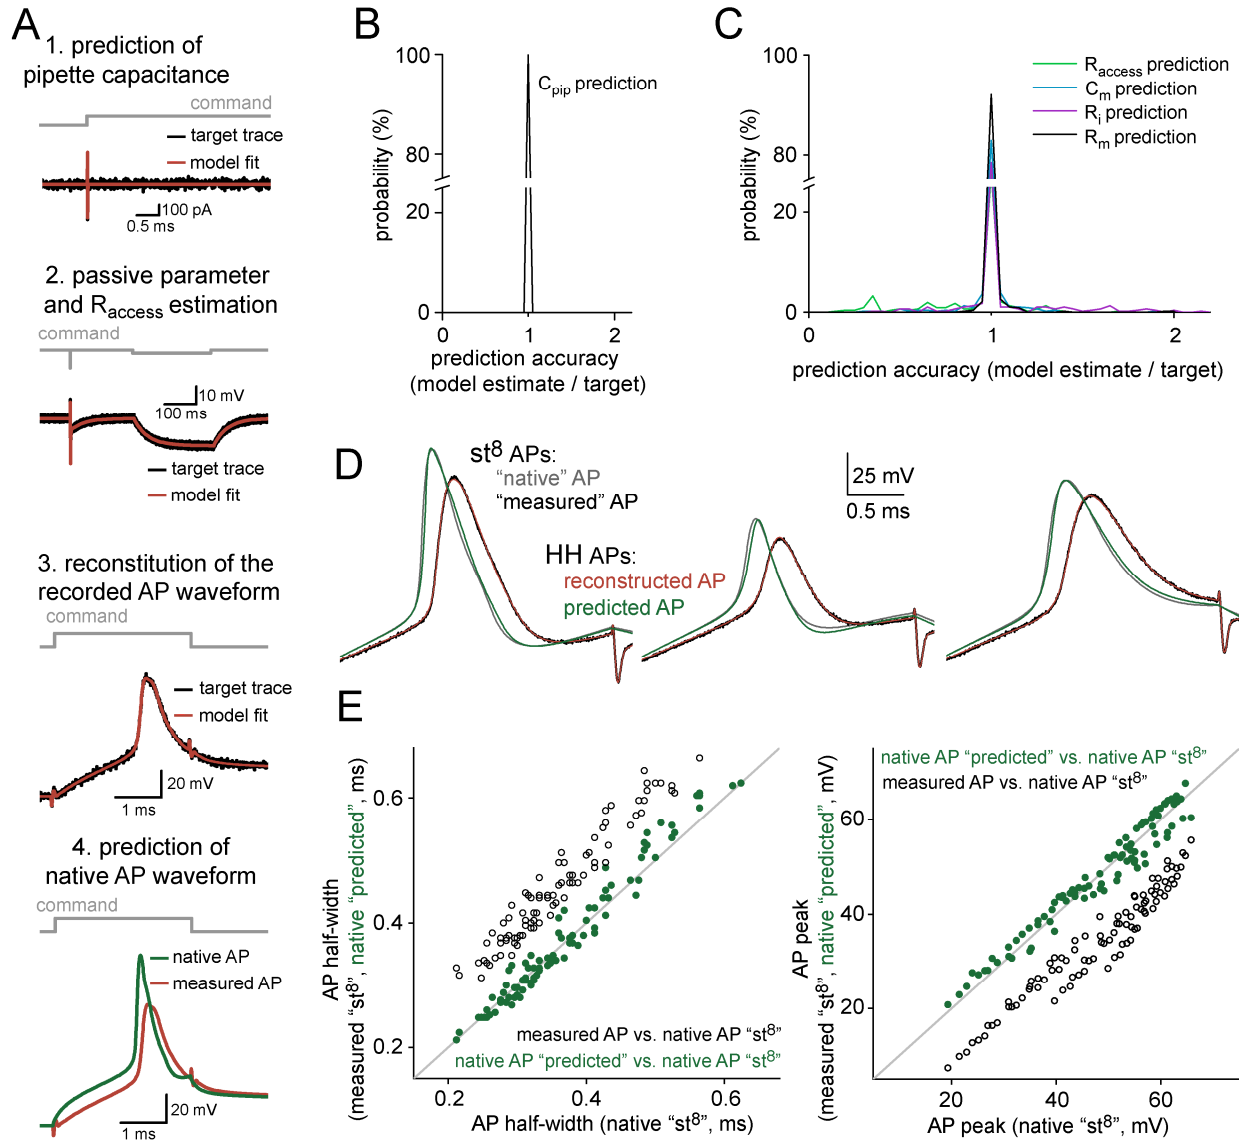

943

944

### Figure S2. Supporting data for Figure 4. Parameter extraction from recorded VC and CC data

945

(A) Outline of the consecutive optimization steps that were used to retrieve the instrumental parameters.

946

(B) Distribution of the relative error in  $C_{\text{pip}}$  estimations.

947

(C) Distribution of the relative errors present in the  $R_{\text{access}}$  and passive parameter estimations.

948

(D) Overlay of representative APs (native and measured, gray and black traces, respectively) generated using 8-state active conductance models and corresponding best-fit APs generated with the standard conductances used in our final model (reconstructed and predicted, red and green traces, respectively).

951

(E) Comparison of measured AP half-width and peak values (black) and the corresponding predicted native parameters (green) with the original value (n=90 simulated experiments). The line indicates equality.

952

953

### Supplementary Figure 3

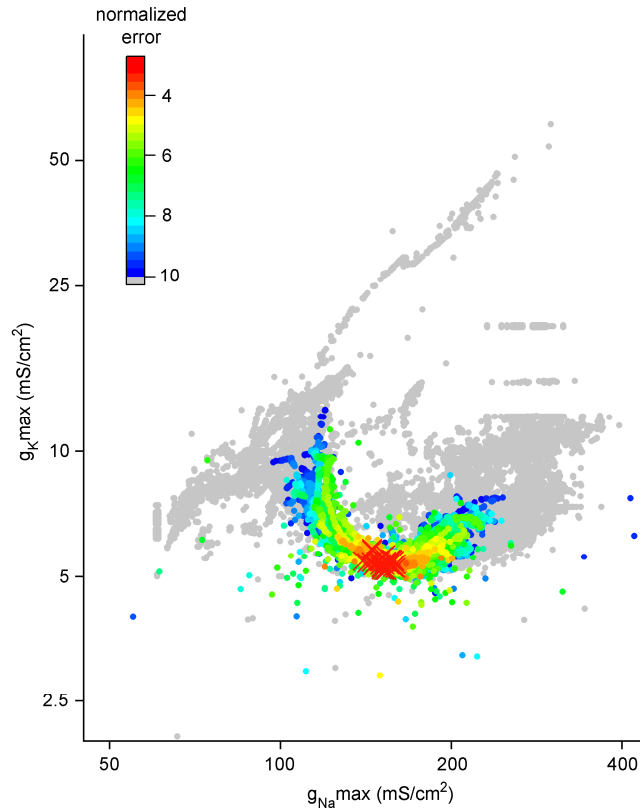

954

#### 955 **Supporting data for Figure 4. Uniqueness of the fit results**

956 The explored parameter space during the optimization of the conductances needed to reconstruct the recorded APs (30 fitted  
957 APs started from 120 initializations). Each dot represent single run during the fit (n=142605 runs). The optimization error  
958 of the each run is color coded. Red crosses mark best-fit solutions.

959

### Supplementary Figure 4

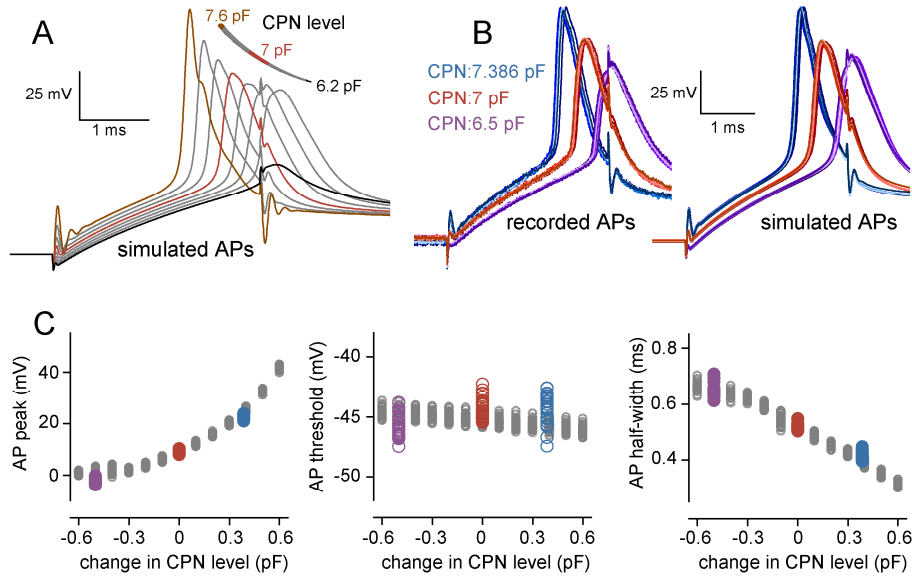

960

961

### Supporting data for Figure 5. Critical influence of the applied CPN on the recorded AP waveforms

962

(A) Model AP waveforms simulated using the same conductance set but different CPN settings. Notice the AP failure at CPN=6.2 pF (black) and the oscillation at CPN=7.6 pF (brown).

963

964

(B) Representative APs recorded (left) and simulated (right) in the same axon with different CPN settings (n=6 APs in each CPN conditions).

965

966

(C) Effects of different CPN level on AP peak (left), threshold (middle) and half-width (right). Gray circles show the AP

967

parameters simulated with the 30 different conductance sets (the same set as in Figure 4). Purple, red and blue symbols

968

show the experimentally recorded AP parameters obtained with three different CPN settings (n=30 APs in each conditions).

969

Zero on x-axis represents the originally set 7 pF capacitance neutralization.

970

### Supplementary Figure 5

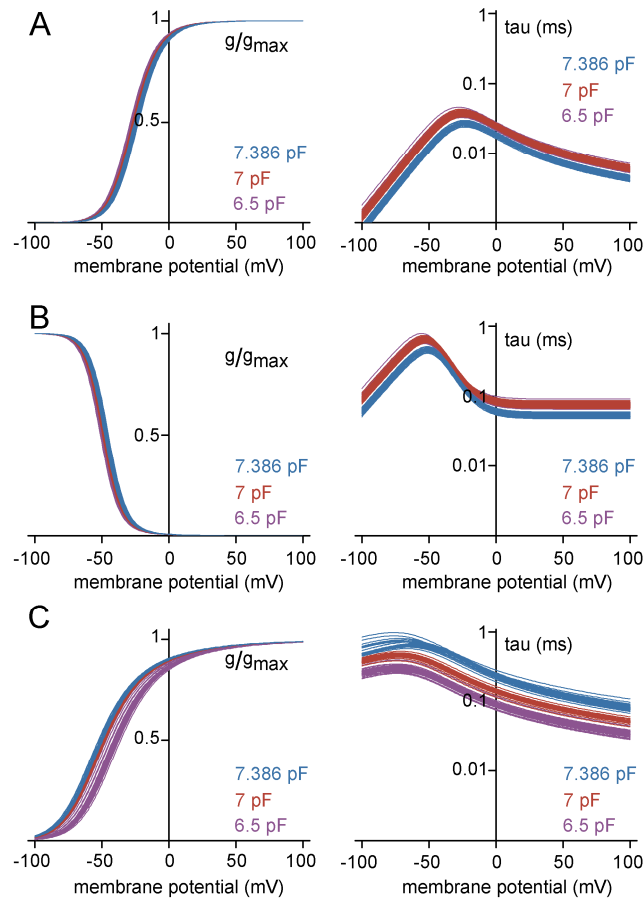

971

972

**Supporting data for Figure 5. Gating profile of model conductances obtained from fitting of AP waveforms with different levels of distortions**

973

974

(A) Voltage dependence (left) and kinetic profile (right) of the activation in Na<sup>+</sup> conductance models obtained by the reconstruction of the APs recorded with different CPN settings (CPN = 6.5 pF in purple, CPN = 7 pF in red and CPN = 7.386 pF in blue). Each line represent single model conductance (n=30/30/28 models).

977

(B) Same as in panel (A) but for the inactivation of the Na<sup>+</sup> conductance models.

978

(C) Same as in panel (A) but for the K<sup>+</sup> conductance models

979

### Supplementary Figure 6

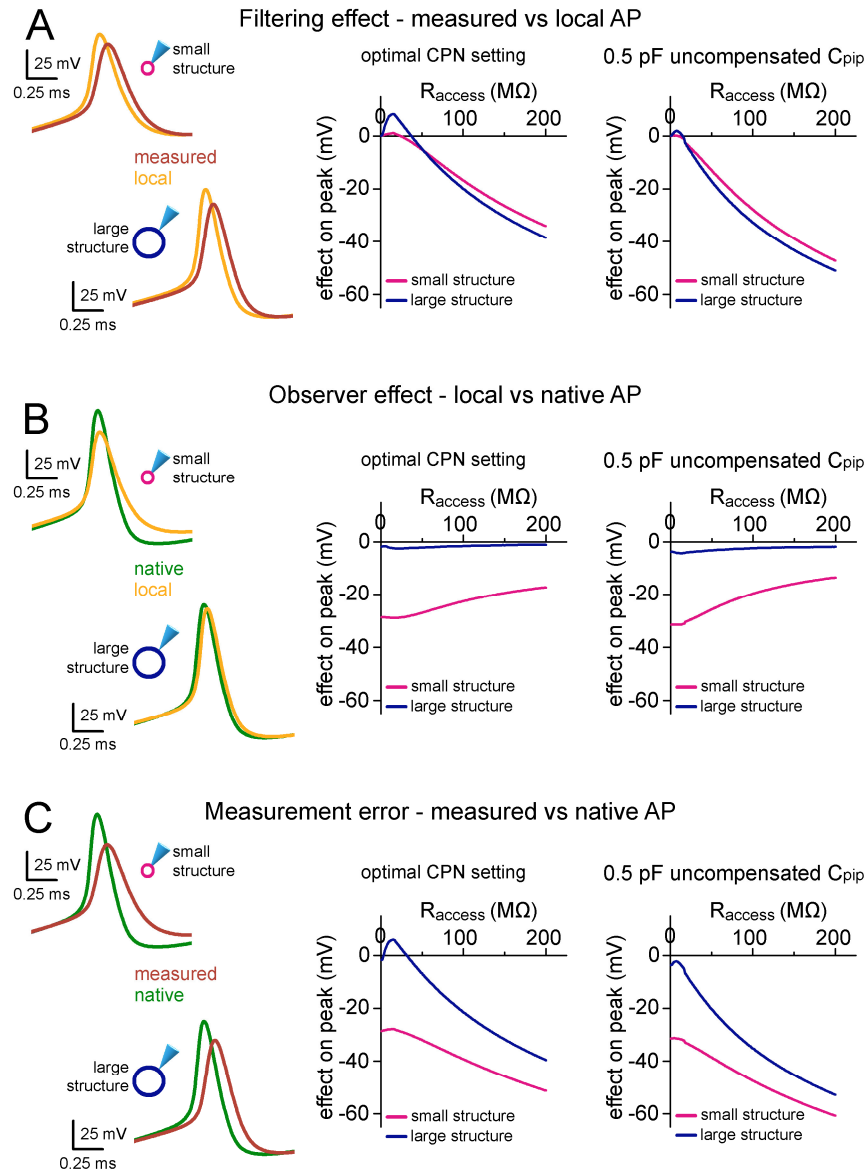

980

981 **Supporting data for Figure 7. Instrumental and structural parameters cooperatively determine signal distortions in**  
982 **recordings from small neuronal structures**

983 The results of the same simulations as in Figure 7, are shown for effects on AP peak.
